# Supplementary material for: New, simple and versatile synthesis of 4,6-disubstituted pyridazin-3(2H)-ones
Source: Royal Society of Chemistry journal article supplement (doi:10.1039/b718734c), 2008-01-01
Supplement: b718734c.pdf [file b718734c.pdf]

## Supporting Materials

### New, versatile synthesis of 4,6-disubstituted pyridazin-3(2*H*)-ones

**Anna Albrecht, Jacek F. Koszuc, Michał Kobuciński and Tomasz Janecki**

<sup>†</sup> Institute of Organic Chemistry, Technical University of Łódź,  
Żeromskiego 116, 90-924 Łódź,  
Phone: (4842) 6313220, Fax: (48 42) 6365530,

E-mail: [tjanecki@p.lodz.pl](mailto:tjanecki@p.lodz.pl)

Characterization data for compounds **7b,c,e,f,h,j,k**, **9a,b,d,f-k** and **10b,c**

**4-Diethoxyphosphorylo-6-ethylpyridazin-3(2H)-one 7b** (0.44 g, 95%) colorless oil (Found: C, 45.9; H, 7.2. C<sub>10</sub>H<sub>19</sub>N<sub>2</sub>O<sub>4</sub>P requires C, 45.8; H, 7.3%);  $\nu_{\max}(\text{film})/\text{cm}^{-1}$  1600, 1232 and 1024;  $\delta_{\text{H}}(250 \text{ MHz}; \text{CDCl}_3; \text{Me}_4\text{Si})$  1.14 (3H, t, *J* 7.4, CH<sub>3</sub>), 1.29-1.38 (6H, m, 2 x CH<sub>3</sub>CH<sub>2</sub>O), 2.37 (2H, q, *J* 7.4, CH<sub>2</sub>), 2.55-3.25 (3H, m, CH<sub>2</sub>, CH), 4.13-4.22 (4H, m, 2 x CH<sub>3</sub>CH<sub>2</sub>O) and 8.50 (1H, s, NH);  $\delta_{\text{C}}(62.9 \text{ MHz}; \text{CDCl}_3; \text{Me}_4\text{Si})$  9.78 (s, CH<sub>3</sub>), 16.05 (d, *J* 5.9 2 x CH<sub>3</sub>CH<sub>2</sub>O), 25.81 (d, *J* 5.2 C-5), 29.51 (s, CH<sub>2</sub>), 34.24 (d, *J* 135.0, C-4), 62.77 (d, *J* 7.5, CH<sub>3</sub>CH<sub>2</sub>O), 62.89 (d, *J* 6.9, CH<sub>3</sub>CH<sub>2</sub>O), 155.14 (d, *J* 5.0, C-6) and 162.54 (d, *J* 4.3, C-3);  $\delta_{\text{P}}(101 \text{ MHz}; \text{CDCl}_3; \text{H}_3\text{PO}_4)$  21.59.

**4-Diethoxyphosphorylo-6-pentylpyridazin-3(2H)-one 7c** (0.58 g, 86%) colorless crystal, mp 55 °C (from Et<sub>2</sub>O) (Found: C, 51.5; H, 8.2. C<sub>13</sub>H<sub>25</sub>N<sub>2</sub>O<sub>4</sub>P requires C, 51.3; H, 8.3%);  $\nu_{\max}(\text{film})/\text{cm}^{-1}$  1684, 1240, and 1024;  $\delta_{\text{H}}(250 \text{ MHz}; \text{CDCl}_3; \text{Me}_4\text{Si})$  0.90 (3H, t, *J* 7.5, CH<sub>3</sub>), 1.24-1.41 (8H, m, 2 x CH<sub>3</sub>CH<sub>2</sub>O, CH<sub>2</sub>), 1.55-1.65 (3H, m, CH<sub>2</sub>, CH), 2.33 (2H, dd, *J* 7.5, CH<sub>2</sub>), 2.70-3.25 (4H, m, 2 x CH<sub>2</sub>), 4.14-4.25 (4H, m, 2 x CH<sub>3</sub>CH<sub>2</sub>O) and 8.31 (1H, s, NH);  $\delta_{\text{C}}(62.9 \text{ MHz}; \text{CDCl}_3; \text{Me}_4\text{Si})$  11.94 (s, CH<sub>3</sub>), 14.32 (d, *J* 6.0, 2 x CH<sub>3</sub>CH<sub>2</sub>O), 20.39 (s, CH<sub>2</sub>), 23.39 (s, CH<sub>2</sub>), 24.18 (d, *J* 5.3, C-5), 29.43 (s, CH<sub>2</sub>), 34.47 (d, *J* 137.4, C-4), 34.57 (s, CH<sub>2</sub>), 60.45 (d, *J* 6.5, CH<sub>3</sub>CH<sub>2</sub>O), 61.12 (d, *J* 6.9, CH<sub>3</sub>CH<sub>2</sub>O), 151.51 (d, *J* 5.1, C-6) and 160.80 (d, *J* 5.0, C-3);  $\delta_{\text{P}}(101 \text{ MHz}; \text{CDCl}_3; \text{H}_3\text{PO}_4)$  21.59.

**6-(3,4-Dimethoxybenzyl)-4-diethoxyphosphorylopyridazin-3(2H)-one 7e** (0.71 g, 85%) yellow oil (Found: C, 53.3; H, 6.8. C<sub>17</sub>H<sub>25</sub>N<sub>2</sub>O<sub>6</sub>P requires C, 53.1; H, 6.6%);  $\nu_{\max}(\text{film})/\text{cm}^{-1}$  1684, 1516, 1240, 1028 and 972;  $\delta_{\text{H}}(250 \text{ MHz}; \text{CDCl}_3; \text{Me}_4\text{Si})$  1.28 (6H, t, *J* 7.5, 2 x CH<sub>3</sub>CH<sub>2</sub>O), 2.52-3.05 (3H, m, CH<sub>2</sub>, CH), 3.56, 3.62 (2H, AB, *J* 15.0, CH<sub>2</sub>), 3.87 (3H, s, CH<sub>3</sub>O), 3.88 (3H, s, CH<sub>3</sub>O), 4.09-4.21 (4H, m, 2 x CH<sub>3</sub>CH<sub>2</sub>O), 6.75-6.85 (3H, m, 3 x CH<sub>Ar</sub>) and 8.42 (1H, s, NH);  $\delta_{\text{C}}(62.9 \text{ MHz}; \text{CDCl}_3; \text{Me}_4\text{Si})$  16.14 (d, *J* 5.6, CH<sub>3</sub>CH<sub>2</sub>O), 16.23 (d, *J* 5.6, CH<sub>3</sub>CH<sub>2</sub>O), 25.52 (d, *J* 5.6, C-5), 36.46 (d, *J* 135.8, C-4), 42.61 (s, CH<sub>2</sub>Ph), 55.81 (s, 2 x CH<sub>3</sub>O), 62.78 (d, *J* 6.8 CH<sub>3</sub>CH<sub>2</sub>O), 63.16 (d, *J* 6.8, CH<sub>3</sub>CH<sub>2</sub>O), 111.27 (s, 2 x C-Ar), 112.15 (s, 2 x C-Ar), 121.21 (s, C-Ar), 127.88 (s, C-Ar), 148.13 (s, C-Ar), 149.08 (s, C-Ar), 153.42 (d, *J* 5.6, C-6) and 162.47 (d, *J* 4.3, C-3);  $\delta_{\text{P}}(101 \text{ MHz}; \text{CDCl}_3; \text{H}_3\text{PO}_4)$  21.34.

**4-Diethoxyphosphorylo-6-phenylpyridazin-3(2H)-one 7f<sup>1</sup>** (0.57 g, 92%) yellow oil (Found: C, 54.3; H, 6.4. C<sub>14</sub>H<sub>19</sub>N<sub>2</sub>O<sub>4</sub>P requires C, 54.2; H, 6.2%);  $\nu_{\max}(\text{film})/\text{cm}^{-1}$  1684, 1616, 1256 and 1004;  $\delta_{\text{H}}(250 \text{ MHz}; \text{CDCl}_3; \text{Me}_4\text{Si})$  1.23 (3H, t, *J* 7.0, CH<sub>3</sub>CH<sub>2</sub>O), 1.34 (3H, t, *J* 7.0, CH<sub>3</sub>CH<sub>2</sub>O), 3.04-3.28 (2H, m, CH<sub>2</sub>), 3.41-3.58 (1H, m, CH), 4.05-4.26 (4H, m, 2 x CH<sub>3</sub>CH<sub>2</sub>O), 7.29-7.47 (3H, m, 3 x CH<sub>Ar</sub>), 7.72-7.77 (2H, m, 2 x CH<sub>Ar</sub>) and 8.82 (1H, s, NH);  $\delta_{\text{C}}(62.9 \text{ MHz}; \text{CDCl}_3; \text{Me}_4\text{Si})$  16.19 (d, *J* 5.6, CH<sub>3</sub>CH<sub>2</sub>O), 16.23 (d, *J* 5.6, CH<sub>3</sub>CH<sub>2</sub>O), 24.16

(d,  $J$  5.6,  $C$ -5), 36.64 (d,  $J$  134.5,  $C$ -4), 63.08 (d,  $J$  5.6,  $\text{CH}_3\text{CH}_2\text{O}$ ), 63.18 (d,  $J$  5.6,  $\text{CH}_3\text{CH}_2\text{O}$ ), 125.99 (s, 2 x  $C$ -Ar), 128.57 (s, 2 x  $C$ -Ar), 129.90 (s,  $C$ -Ar), 135.18 (s,  $C$ -Ar), 149.57 (d,  $J$  4.9,  $C$ -6) and 162.77 (d,  $J$  4.3,  $C$ -3);  $\delta_{\text{P}}$ (101 MHz;  $\text{CDCl}_3$ ;  $\text{H}_3\text{PO}_4$ ) 21.35.

**4-Diethoxyphosphorylo-6-(4-methoxyphenyl)-pyridazin-3(2H)-one 7h** (0.44 g, 65%) yellow oil (Found: C, 52.6; H, 6.5.  $\text{C}_{15}\text{H}_{21}\text{N}_2\text{O}_5\text{P}$  requires C, 52.9; H, 6.2%);  $\nu_{\text{max}}$ (film)/ $\text{cm}^{-1}$  1680, 1512, 1248, and 1032;  $\delta_{\text{H}}$ (250 MHz;  $\text{CDCl}_3$ ;  $\text{Me}_4\text{Si}$ ) 1.22 (3H, t,  $J$  7.0,  $\text{CH}_3\text{CH}_2\text{O}$ ), 1.34 (3H, t,  $J$  7.0,  $\text{CH}_3\text{CH}_2\text{O}$ ), 3.00-3.26 (2H, m,  $\text{CH}_2$ ), 3.37-3.55 (1H, m,  $\text{CH}$ ), 4.04-4.26 (4H, m, 2 x  $\text{CH}_3\text{CH}_2\text{OP}(\text{O})$ ), 6.84-6.96 (2H, m, 2 x  $\text{CH}_{\text{Ar}}$ ), 7.66-7.72 (2H, m, 2 x  $\text{CH}_{\text{Ar}}$ ) and 8.54 (1H, s,  $\text{NH}$ );  $\delta_{\text{C}}$ (62.9 MHz;  $\text{CDCl}_3$ ;  $\text{Me}_4\text{Si}$ ) 16.01 (d,  $J$  5.6, 2 x  $\text{CH}_3\text{CH}_2\text{O}$ ), 23.82 (d,  $J$  4.9,  $C$ -5), 36.42 (d,  $J$  135.1,  $C$ -4), 55.22 (s,  $\text{OCH}_3$ ), 62.98 (d,  $J$  6.8,  $\text{CH}_3\text{CH}_2\text{O}$ ), 63.10 (d,  $J$  6.8,  $\text{CH}_3\text{CH}_2\text{O}$ ), 113.12 (s, 2 x  $C$ -Ar), 127.41 (s,  $C$ -Ar), 127.58 (s, 2 x  $C$ -Ar), 149.17 (s,  $C$ -6), 160.84 (s,  $C$ -Ar) and 162.72 (s,  $C$ -3);  $\delta_{\text{P}}$ (101 MHz;  $\text{CDCl}_3$ ;  $\text{H}_3\text{PO}_4$ ) 21.40.

**4-Diethoxyphosphorylo-2,6-diphenylpyridazin-3(2H)-one 7j** (0.53 g, 69%) yellow oil (Found: C, 62.4; H, 6.1.  $\text{C}_{20}\text{H}_{23}\text{N}_2\text{O}_4\text{P}$  requires C, 62.2; H, 6.0%);  $\nu_{\text{max}}$ (film)/ $\text{cm}^{-1}$  1676, 1324, 1254 and 1020;  $\delta_{\text{H}}$ (250 MHz;  $\text{CDCl}_3$ ;  $\text{Me}_4\text{Si}$ ) 1.24 (3H, dt,  $J$  7.0 and 0.5,  $\text{CH}_3\text{CH}_2\text{O}$ ), 1.34 (3H, dt,  $J$  7.0 and 0.5,  $\text{CH}_3\text{CH}_2\text{O}$ ), 3.12-3.49 (2H, m,  $\text{CH}_2$ ), 3.51-3.70 (1H, m,  $\text{CH}$ ), 4.02-4.29 (4H, m, 2 x  $\text{CH}_3\text{CH}_2\text{O}$ ), 7.28-7.32 (1H, m,  $\text{CH}_{\text{Ar}}$ ), 7.38-7.48 (2H, m, 2 x  $\text{CH}_{\text{Ar}}$ ), 7.54-7.62 (5H, m, 5 x  $\text{CH}_{\text{Ar}}$ ) and 7.78-7.90 (2H, m, 2 x  $\text{CH}_{\text{Ar}}$ );  $\delta_{\text{C}}$ (62.9 MHz;  $\text{CDCl}_3$ ;  $\text{Me}_4\text{Si}$ ) 14.57 (d,  $J$  6.0, 2 x  $\text{CH}_3\text{CH}_2\text{O}$ ), 22.85 (d,  $J$  5.1,  $C$ -5), 36.34 (d,  $J$  136.2,  $C$ -4), 61.36 (d,  $J$  7.2,  $\text{CH}_3\text{CH}_2\text{O}$ ), 61.48 (d,  $J$  7.9,  $\text{CH}_3\text{CH}_2\text{O}$ ), 123.30 (s,  $C$ -Ar), 124.54 (s,  $C$ -Ar), 125.11 (s,  $C$ -Ar), 126.80 (s, 2 x  $C$ -Ar), 126.88 (s, 2 x  $C$ -Ar), 128.35 (s,  $C$ -Ar), 133.41 (s,  $C$ -Ar), 139.45 (s,  $C$ -Ar), 148.40 (d,  $J$  5.8,  $C$ -6) and 159.24 (d,  $J$  4.6,  $C$ -3);  $\delta_{\text{P}}$ (101 MHz;  $\text{CDCl}_3$ ;  $\text{H}_3\text{PO}_4$ ) 22.02.

**6-(4-Bromophenyl)-4-diethoxyphosphorylo-2-phenylpyridazin-3(2H)-one 7k** (0.72 g, 78%) orange oil (Found: C, 51.4; H, 4.9.  $\text{C}_{20}\text{H}_{22}\text{BrN}_2\text{O}_4\text{P}$  requires C, 51.6; H, 4.8%);  $\nu_{\text{max}}$ (film)/ $\text{cm}^{-1}$  1680, 1492, 1260 and 1020;  $\delta_{\text{H}}$ (250 MHz;  $\text{CDCl}_3$ ;  $\text{Me}_4\text{Si}$ ) 1.21 (3H, t,  $J$  7.0,  $\text{CH}_3\text{CH}_2\text{O}$ ), 1.34 (3H, t,  $J$  7.0,  $\text{CH}_3\text{CH}_2\text{O}$ ), 3.10-3.65 (3H, m,  $\text{CH}_2$ ,  $\text{CH}$ ), 4.02-4.28 (4H, m, 2 x  $\text{CH}_3\text{CH}_2\text{O}$ ), 6.60-6.82 (2H, m, 2 x  $\text{CH}_{\text{Ar}}$ ), 7.12-7.20 (2H, m, 2 x  $\text{CH}_{\text{Ar}}$ ), 7.38-7.58 (4H, m, 4 x  $\text{CH}_{\text{Ar}}$ ) and 7.66-7.72 (1H, m,  $\text{CH}_{\text{Ar}}$ );  $\delta_{\text{C}}$ (62.9 MHz;  $\text{CDCl}_3$ ;  $\text{Me}_4\text{Si}$ ) 14.58 (d,  $J$  5.7, 2 x  $\text{CH}_3\text{CH}_2\text{O}$ ), 22.69 (d,  $J$  5.1,  $C$ -5), 36.26 (d,  $J$  135.4,  $C$ -4), 61.44 (d,  $J$  5.0,  $\text{CH}_3\text{CH}_2\text{O}$ ), 61.53 (d,  $J$  6.5,  $\text{CH}_3\text{CH}_2\text{O}$ ), 113.37 (s,  $C$ -Ar), 116.77 (s,  $C$ -Ar), 122.83 (s, 2 x  $C$ -Ar), 123.32 (s,  $C$ -Ar), 125.27 (s,  $C$ -Ar), 126.09 (s,  $C$ -Ar), 126.86 (s,  $C$ -Ar), 127.49 (s, 2 x  $C$ -Ar), 130.09 (s,  $C$ -Ar), 132.33 (s,  $C$ -Ar), 147.25 (d,  $J$  5.3,  $C$ -6) and 159.15 (d,  $J$  4.6,  $C$ -3);  $\delta_{\text{P}}$ (101 MHz;  $\text{CDCl}_3$ ;  $\text{H}_3\text{PO}_4$ ) 21.44.

**4,6-Dimethylpyridazin-3(2H)-one 9a<sup>2,3</sup>** (0.093 g, 75%) colorless oil (Found: C, 58.3; H, 6.3. C<sub>6</sub>H<sub>8</sub>N<sub>2</sub>O requires C, 58.05; H, 6.5%);  $\nu_{\max}(\text{film})/\text{cm}^{-1}$  1628, 1608, 952 and 912;  $\delta_{\text{H}}(250 \text{ MHz}; \text{CDCl}_3; \text{Me}_4\text{Si})$  2.19 (3H, s, CH<sub>3</sub>), 2.28 (3H, s, CH<sub>3</sub>), 7.00 (1H, s, CH) and 10.56 (1H, s, NH);  $\delta_{\text{C}}(62.9 \text{ MHz}; \text{CDCl}_3; \text{Me}_4\text{Si})$  12.48 (s, CH<sub>3</sub>), 16.20 (s, CH<sub>3</sub>), 131.82 (s, C-5), 140.80 (s, C-4), 145.33 (s, C-6) and 162.82 (s, C-3).

**6-Ethyl-4-methylpyridazin-3(2H)-one 9b<sup>4</sup>** (0.117 g, 85%) colorless crystal, mp 78 °C (from Et<sub>2</sub>O) (Found: C, 61.0; H, 7.2. C<sub>7</sub>H<sub>10</sub>N<sub>2</sub>O requires C, 60.85; H, 7.3%);  $\nu_{\max}(\text{film})/\text{cm}^{-1}$  1660, 1608 and 784;  $\delta_{\text{H}}(250 \text{ MHz}; \text{CDCl}_3; \text{Me}_4\text{Si})$  1.23 (3H, t, *J* 7.5, CH<sub>3</sub>), 2.21 (3H, d, *J* 1.2, CH<sub>3</sub>), 2.59 (2H, q, *J* 7.5, CH<sub>2</sub>), 7.03 (1H, q, *J* 1.2, CH) and 10.56 (1H, s, NH);  $\delta_{\text{C}}(62.9 \text{ MHz}; \text{CDCl}_3; \text{Me}_4\text{Si})$  15.96 (s, CH<sub>3</sub>), 20.42 (s, CH<sub>3</sub>), 27.78 (s, CH<sub>2</sub>), 130.94 (s, C-5), 140.38 (s, C-4), 150.02 (s, C-6) and 162.72 (s, C-3).

**6-Benzyl-4-methylpyridazin-3(2H)-one 9d<sup>2</sup>** (0.140 g, 70%) colorless crystal, mp 130 °C (from Et<sub>2</sub>O) (Found: C, 72.1; H, 5.9. C<sub>12</sub>H<sub>12</sub>N<sub>2</sub>O requires C, 72.0; H, 6.0%);  $\nu_{\max}(\text{film})/\text{cm}^{-1}$  1656, 1612, 1460, 1232, 1008 and 952;  $\delta_{\text{H}}(250 \text{ MHz}; \text{CDCl}_3; \text{Me}_4\text{Si})$  2.15 (3H, s, CH<sub>3</sub>), 3.89 (2H, s, CH<sub>2</sub>), 6.91 (1H, s, CH), 7.21-7.37 (5H, m, 5 x CH<sub>Ar</sub>) and 11.71 (1H, s, NH);  $\delta_{\text{C}}(62.9 \text{ MHz}; \text{CDCl}_3; \text{Me}_4\text{Si})$  15.26 (s, CH<sub>3</sub>), 39.92 (s, CH<sub>2</sub>Ph), 125.96 (s, C-5), 127.82 (s, 2 x C-Ar), 127.90 (s, 2 x C-Ar), 130.18 (s, C-Ar), 133.02 (s, C-Ar), 139.76 (s, C-4), 147.03 (s, C-6) and 161.71 (s, C-3).

**4-Methyl-6-phenylpyridazin-3(2H)-one 9f<sup>3</sup>** (0.163 g, 88%) yellow oil (Found: C, 71.2; H, 5.3. C<sub>11</sub>H<sub>10</sub>N<sub>2</sub>O requires C, 70.95; H, 5.4%);  $\nu_{\max}(\text{film})/\text{cm}^{-1}$  1648, 1576, 1532, 1260 and 1008;  $\delta_{\text{H}}(250 \text{ MHz}; \text{CDCl}_3; \text{Me}_4\text{Si})$  2.04 (3H, s, CH<sub>3</sub>), 7.12 (1H, s, CH), 7.44-7.46 (3H, m, 3 x CH<sub>Ar</sub>) and 7.58-7.82 (2H, m, 2 x CH<sub>Ar</sub>);  $\delta_{\text{C}}(62.9 \text{ MHz}; \text{CDCl}_3; \text{Me}_4\text{Si})$  13.98 (s, CH<sub>3</sub>), 124.97 (s, 2 x C-Ar), 125.06 (s, C-Ar), 127.99 (s, C-5), 128.60 (s, 2 x C-Ar), 130.69 (s, C-Ar), 133.48 (s, C-4), 144.65 (s, C-6) and 160.71 (s, C-3).

**6-(4-Bromophenyl)-4-methylpyridazin-3(2H)-one 9g<sup>5</sup>** (0.235 g, 89%) colorless oil (Found: C, 49.6; H, 3.6. C<sub>11</sub>H<sub>9</sub>BrN<sub>2</sub>O requires C, 49.8; H, 3.4%);  $\nu_{\max}(\text{film})/\text{cm}^{-1}$  1648, 1576, 1532, 1260 and 1008;  $\delta_{\text{H}}(250 \text{ MHz}; \text{CDCl}_3; \text{Me}_4\text{Si})$  2.30 (3H, s, CH<sub>3</sub>), 7.56-7.67 (5H, m, CH, 4 x CH<sub>Ar</sub>) and 10.60 (1H, s, NH);  $\delta_{\text{C}}(62.9 \text{ MHz}; \text{CDCl}_3; \text{Me}_4\text{Si})$  16.61 (s, CH<sub>3</sub>), 123.79 (s, C-Ar), 127.52 (s, 2 x C-Ar), 128.41 (s, C-5), 132.01 (s, 2 x C-Ar), 133.81 (s, C-4), 144.40 (s, C-6), 140.91 (s, C-Ar) and 162.78 (s, C-3).

**6-(4-Methoxyphenyl)-4-methylpyridazin-3(2H)-one 9h<sup>2,5</sup>** (0.129 g, 60%) dark orange oil (Found: C, 66.4; H, 5.8. C<sub>12</sub>H<sub>12</sub>N<sub>2</sub>O<sub>2</sub> requires C, 66.65; H, 5.6%);  $\nu_{\max}(\text{film})/\text{cm}^{-1}$  1660, 1608,

1512, 1252, 1176 and 1000;  $\delta_{\text{H}}$ (250 MHz;  $\text{CDCl}_3$ ;  $\text{Me}_4\text{Si}$ ) 2.30 (3H, s,  $\text{CH}_3$ ), 3.86 (3H, s,  $\text{CH}_3\text{O}$ ), 6.96-6.99 (2H, m, 2 x  $\text{CH}_{\text{Ar}}$ ), 7.56 (1H, s,  $\text{CH}$ ) and 7.69-7.73 (2H, m, 2 x  $\text{CH}_{\text{Ar}}$ );  $\delta_{\text{C}}$ (62.9 MHz;  $\text{CDCl}_3$ ;  $\text{Me}_4\text{Si}$ ) 13.10 (s,  $\text{CH}_3$ ), 54.38 (s,  $\text{OCH}_3$ ), 113.30 (s, 2 x  $\text{C-Ar}$ ), 124.50 (s,  $\text{C-Ar}$ ), 126.34 (s, 2 x  $\text{C-Ar}$ ), 127.72 (s,  $\text{C-4}$ ), 139.83 (s,  $\text{C-Ar}$ ), 144.50 (s,  $\text{C-5}$ ), 159.70 (s,  $\text{C-6}$ ) and 160.78 (s,  $\text{C-3}$ ).

**6-Ethyl-4-methyl-2-phenylpyridazin-3(2H)-one 9i**<sup>6</sup> (0.104 g, 49%) orange oil (Found: C, 72.7; H, 6.5.  $\text{C}_{13}\text{H}_{14}\text{N}_2\text{O}$  requires C, 72.8; H, 6.6%);  $\nu_{\text{max}}$ (film)/ $\text{cm}^{-1}$  1660, 1620, 1456 and 1288;  $\delta_{\text{H}}$ (250 MHz;  $\text{CDCl}_3$ ;  $\text{Me}_4\text{Si}$ ) 1.23 (3H, t,  $J$  7.5  $\text{CH}_3\text{CH}_2$ ), 2.24 (3H, s,  $\text{CH}_3$ ), 2.62 (2H, t,  $J$  7.5  $\text{CH}_3\text{CH}_2$ ), 7.04 (1H, s,  $\text{CH}$ ) 7.32-7.50 (3H, m, 3 x  $\text{CH}_{\text{Ar}}$ ) and 7.56-7.65 (2H, m, 2 x  $\text{CH}_{\text{Ar}}$ );  $\delta_{\text{C}}$  (62.9 MHz;  $\text{CDCl}_3$ ;  $\text{Me}_4\text{Si}$ ) 11.69 (s,  $\text{CH}_3\text{CH}_2$ ), 15.96 (s,  $\text{CH}_3$ ), 27.16 (s,  $\text{CH}_3\text{CH}_2$ ), 124.54 (s, 2 x  $\text{C-Ar}$ ), 126.76 (s,  $\text{C-5}$ ), 127.61 (s, 2 x  $\text{C-Ar}$ ), 128.53 (s,  $\text{C-Ar}$ ), 140.67 (s,  $\text{C-4}$ ), 141.09 (s,  $\text{C-Ar}$ ), 148.18 (s,  $\text{C-6}$ ) and 159.67 (s,  $\text{C-3}$ ).

**2,6-Diphenyl-4-methylpyridazin-3(2H)-one 9j**<sup>7</sup> (0.175 g, 67%) orange crystal mp 184 °C (from  $\text{Et}_2\text{O}$ ) (Found: C, 77.6; H, 5.7.  $\text{C}_{17}\text{H}_{14}\text{N}_2\text{O}$  requires C, 77.8; H, 5.4%);  $\nu_{\text{max}}$ (film)/ $\text{cm}^{-1}$  1652, 1616, 1592, 1200 and 1008;  $\delta_{\text{H}}$ (250 MHz;  $\text{CDCl}_3$ ;  $\text{Me}_4\text{Si}$ ) 2.37 (3H, s,  $\text{CH}_3$ ), 7.34-7.58 (6H, m, 6 x  $\text{CH}_{\text{Ar}}$ ), 7.64-7.74 (4H, m, 4 x  $\text{CH}_{\text{Ar}}$ ) and 7.86 (1H, s,  $\text{CH}$ );  $\delta_{\text{C}}$ (62.9 MHz;  $\text{CDCl}_3$ ;  $\text{Me}_4\text{Si}$ ) 16.34 (s,  $\text{CH}_3$ ), 124.57 (s, 2 x  $\text{C-Ar}$ ), 125.07 (s, 2 x  $\text{C-Ar}$ ), 126.48 (s,  $\text{C-5}$ ), 126.92 (s,  $\text{C-Ar}$ ), 127.59 (s, 2 x  $\text{C-Ar}$ ), 127.83 (s, 2 x  $\text{C-Ar}$ ), 128.33 (s,  $\text{C-Ar}$ ), 134.02 (s,  $\text{C-Ar}$ ), 140.56 (s,  $\text{C-4}$ ), 141.10 (s,  $\text{C-Ar}$ ), 143.48 (s,  $\text{C-6}$ ) and 159.59 (s,  $\text{C-3}$ ).

**6-(4-Bromophenyl)-4-methyl-2-phenylpyridazin-3(2H)-one 9k** (0.170 g, 50%) orange crystal mp 147 °C (from  $\text{Et}_2\text{O}$ ) (Found: C, 60.0; H, 3.65.  $\text{C}_{17}\text{H}_{13}\text{BrN}_2\text{O}$  requires C, 59.8; H, 3.8%);  $\nu_{\text{max}}$ (film)/ $\text{cm}^{-1}$  1652, 1524 and 1344;  $\delta_{\text{H}}$ (250 MHz;  $\text{CDCl}_3$ ;  $\text{Me}_4\text{Si}$ ) 2.35 (3H, d,  $J$  1.2  $\text{CH}_3$ ), 7.35-7.62 (6H, m,  $\text{CH}$ , 5 x  $\text{CH}_{\text{Ar}}$ ) and 7.64-7.75 (4H, m, 4 x  $\text{CH}_{\text{Ar}}$ );  $\delta_{\text{C}}$ (62.9 MHz;  $\text{CDCl}_3$ ;  $\text{Me}_4\text{Si}$ ) 17.41 (s,  $\text{CH}_3$ ), 123.81 (s,  $\text{C-Ar}$ ), 125.55 (s, 2 x  $\text{C-Ar}$ ), 127.02 (s,  $\text{C-Ar}$ ), 127.59 (s, 2 x  $\text{C-Ar}$ ), 128.09 (s,  $\text{C-5}$ ), 128.67 (s, 2 x  $\text{C-Ar}$ ), 132.03 (s, 2 x  $\text{C-Ar}$ ), 133.91 (s,  $\text{C-4}$ ), 141.87 (s,  $\text{C-Ar}$ ), 141.92 (s,  $\text{C-Ar}$ ), 143.41 (s,  $\text{C-6}$ ) and 160.50 (s,  $\text{C-3}$ ).

**4-Isobutyl-6-pentylpyridazin-3(2H)-one 10b** (0.133 g, 60%) colorless oil (Found: C, 70.3; H, 9.8.  $\text{C}_{13}\text{H}_{22}\text{N}_2\text{O}$  requires C, 70.2; H, 10.0%);  $\nu_{\text{max}}$ (film)/ $\text{cm}^{-1}$  1656, 1608 and 1464;  $\delta_{\text{H}}$ (250 MHz;  $\text{CDCl}_3$ ;  $\text{Me}_4\text{Si}$ ) 0.81-1.05 (9H, m, 3 x  $\text{CH}_3$ ), 1.25-1.40 (2H, m,  $\text{CH}_2$ ), 1.55-1.68 (6H, m, 3 x  $\text{CH}_2$ ), 2.31-2.60 (3H, m,  $\text{CH}_2$ ,  $\text{CH}$ ), 7.23 (1H, s,  $\text{CH}$ ) and 11.46 (1H, s,  $\text{NH}$ );  $\delta_{\text{C}}$ (62.9 MHz;  $\text{CDCl}_3$ ;  $\text{Me}_4\text{Si}$ ) 13.86 (s,  $\text{CH}_3$ ), 22.35 (s, 2 x  $\text{CH}_3$ ), 26.53 (s,  $\text{CH}(\text{CH}_3)_2$ ), 28.19 (s,  $\text{CH}_2$ ), 31.16 (s,  $\text{CH}_2$ ), 31.49 (s,  $\text{CH}_2$ ), 34.49 (s,  $\text{CH}_2$ ), 38.84 (s,  $\text{CH}_2$ ), 130.95 (s,  $\text{C-5}$ ), 142.88 (s,  $\text{C-4}$ ), 149.10 (s,  $\text{C-6}$ ) and 162.75 (s,  $\text{C-3}$ ).

**4-Benzyl-2,6-diphenylpyridazin-3(2H)-one 10c** (0.253 g, 75%) yellow crystal mp 118 °C (from Et<sub>2</sub>O) (Found: C, 81.7; H, 5.6. C<sub>23</sub>H<sub>18</sub>N<sub>2</sub>O requires C, 81.6; H, 5.4%);  $\nu_{\max}(\text{film})/\text{cm}^{-1}$  1660, 1616 and 1280;  $\delta_{\text{H}}(250 \text{ MHz}; \text{CDCl}_3; \text{Me}_4\text{Si})$  4.27 (2H, d, *J* 1.2, CH<sub>2</sub>), 7.55-7.76 (12H, m, 11 x CH<sub>Ar</sub>, CH), 7.90-8.10 (4H, m, 4 x CH<sub>Ar</sub>);  $\delta_{\text{C}}(62.9 \text{ MHz}; \text{CDCl}_3; \text{Me}_4\text{Si})$  36.39 (s, CH<sub>2</sub>Ph) 125.47 (s, 2 x C-Ar), 125.64 (s, 2 x C-Ar), 126.81 (s, 2 x C-Ar), 127.86 (s, C-5), 128.50 (s, 2 x C-Ar), 128.82 (s, 4 x C-Ar), 128.99 (s, C-Ar), 129.22 (s, C-Ar), 129.40 (s, C-Ar), 129.55 (s, C-Ar), 134.86 (s, C-Ar) 137.14 (s, C-4), 141.94 (s, C-Ar), 144.46 (s, C-6) and 159.85 (s, C-3).

**2,6-Diphenyl-4-isobutylpyridazin-3(2H)-one 10d** (0.231 g, 76%) orange crystal mp 62 °C (from Et<sub>2</sub>O) (Found: C, 79.1; H, 6.4. C<sub>20</sub>H<sub>20</sub>N<sub>2</sub>O requires C, 78.9; H, 6.6%);  $\nu_{\max}(\text{film})/\text{cm}^{-1}$  1660, 1616, 1492, 1440, 1296 and 1196;  $\delta_{\text{H}}(250 \text{ MHz}; \text{CDCl}_3; \text{Me}_4\text{Si})$  1.00 (6H, d, *J* 7.0, (CH<sub>3</sub>)<sub>2</sub>CH), 2.05-2.30 (1H, m, (CH<sub>3</sub>)<sub>2</sub>CH), 2.58 (2H, d, *J* 7.0, CH<sub>2</sub>), 7.34-7.55 (6H, m, 5 x CH<sub>Ar</sub>, CH), 7.67-7.74 (3H, m, 3 x CH<sub>Ar</sub>) and 7.82-7.86 (2H, m, 2 x CH<sub>Ar</sub>);  $\delta_{\text{C}}(62.9 \text{ MHz}; \text{CDCl}_3; \text{Me}_4\text{Si})$  22.55 (s, 2 x CH<sub>3</sub>), 26.88 (s, (CH<sub>3</sub>)<sub>2</sub>CH), 40.02 (s, (CH<sub>3</sub>)<sub>2</sub>CHCH<sub>2</sub>) 125.55 (s, 2 x C-Ar), 126.06 (s, 2 x C-Ar), 127.30 (s, C-5), 127.84 (s, C-Ar), 128.51 (s, 2 x C-Ar), 128.81 (s, 2 x C-Ar), 129.30 (s, C-Ar), 135.10 (s, C-Ar), 142.10 (s, C-4), 144.23 (s, C-Ar), 144.41 (s, C-6) and 160.30 (s, C-3).

#### References for supporting information:

- (1) S.Touil and H. Zantour, *Phosphorus, Sulfur Silicon Relat. Elem.* 1998, **134**, 493
- (2) C-G. Wermuth, G. Schlewer, J-J. Bourguignon, G. Maghiros, M-J. Bouchet, C. Moire, J-P. Kan, P. Worms and K. Biziere, *K. J. Med. Chem.* 1989, **32**, 528.
- (3) W. Hu, H.R. Ranaivo, S.M. Roy, H.A. Behanna, L.K. Wing, L. Munoz, L. Guo, L.J. Van Eldik and D.M. Watterson, *Bioorg.Med.Chem. Lett* 2007, **17**, 414
- (4) P.G. Baraldi, A. Bigoni, B. Cacciari, C. Caldari, S. Manfredini and G. Spalluto, *Synthesis*, 1994, 1158.
- (5) A.A. Siddiqui and S.M. Wani, *Indian. J. Chem. Sect. B*, 2004, **43B**, 1574.
- (6) Hoffman-La Roche *US Pat.* US 2783232, 1955
- (7) G. Leclerc, C-G. Wermuth, *C.R. Hebd. Seances Acad. Sci. Ser. C*, 1968, **267**, 1242

$^{13}\text{C}$ ,  $^1\text{H}$  NMR spectra of **9c**, **9e**, **9k**, **9l**, **10a**, **10b**, **10c** and **10d**.

Graphic data.

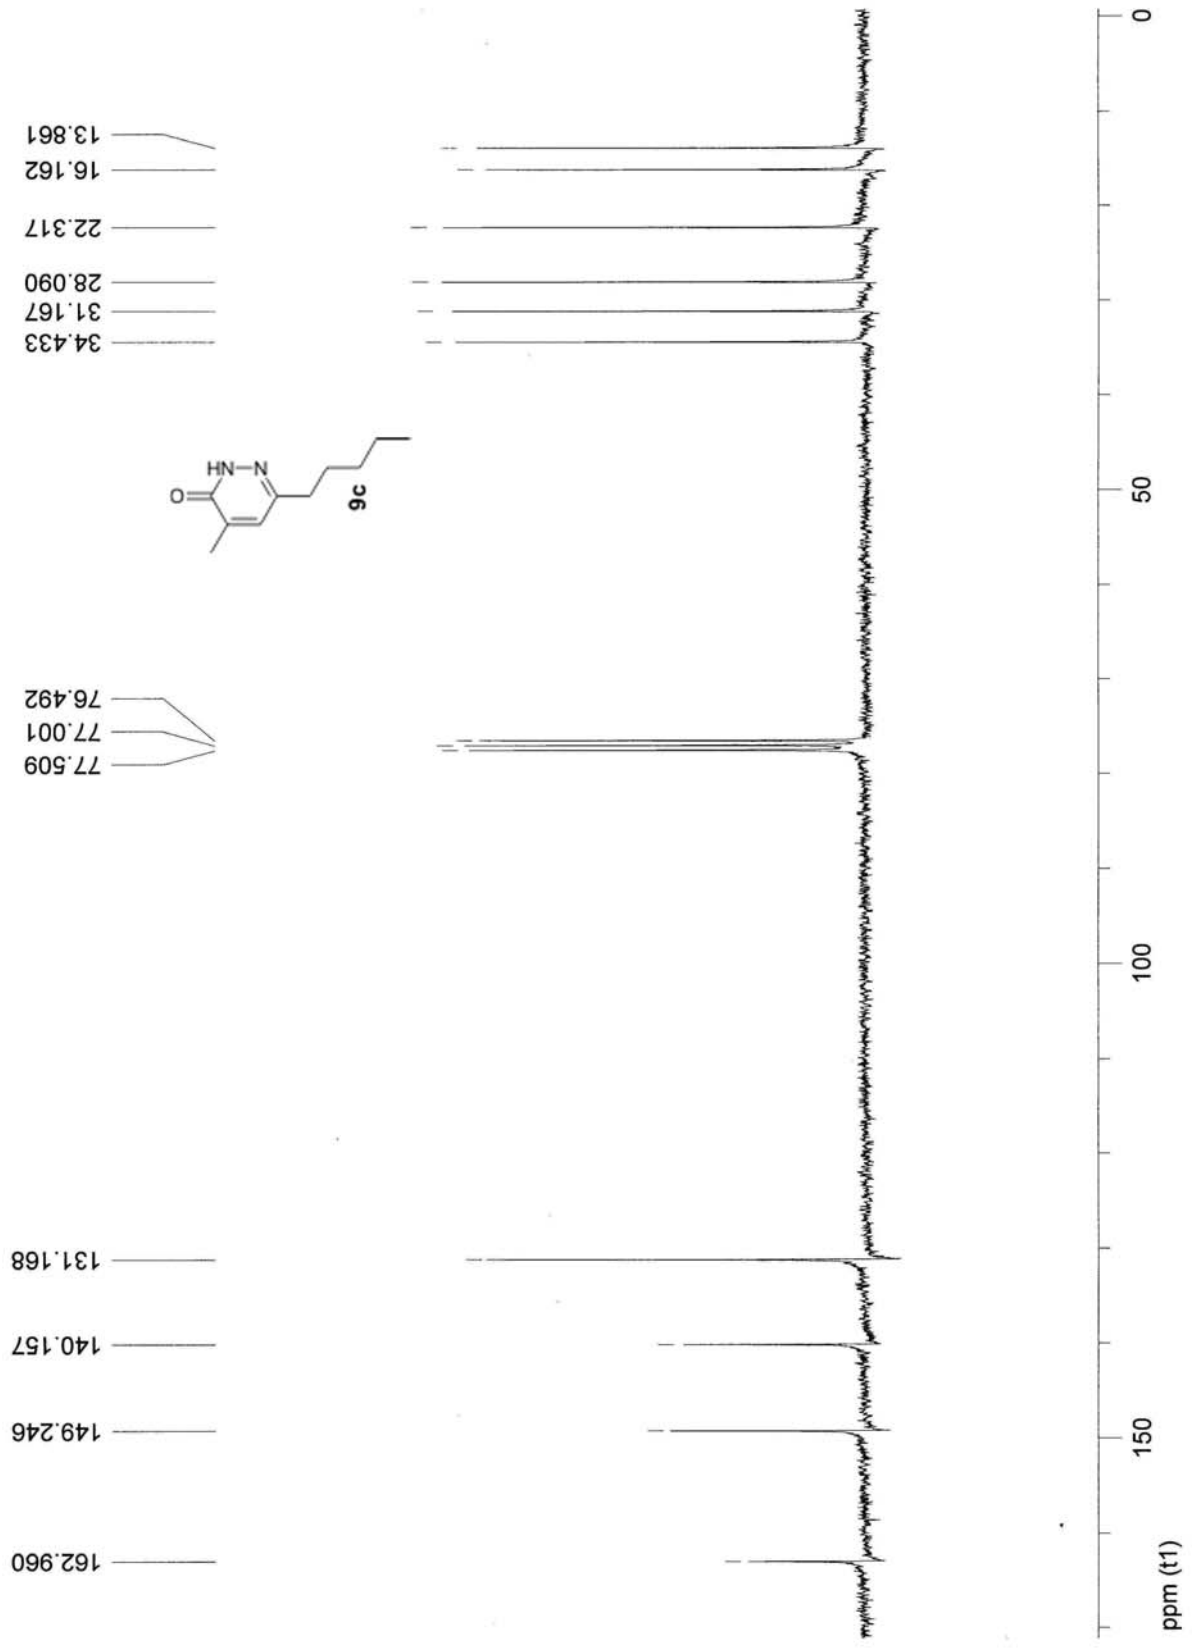



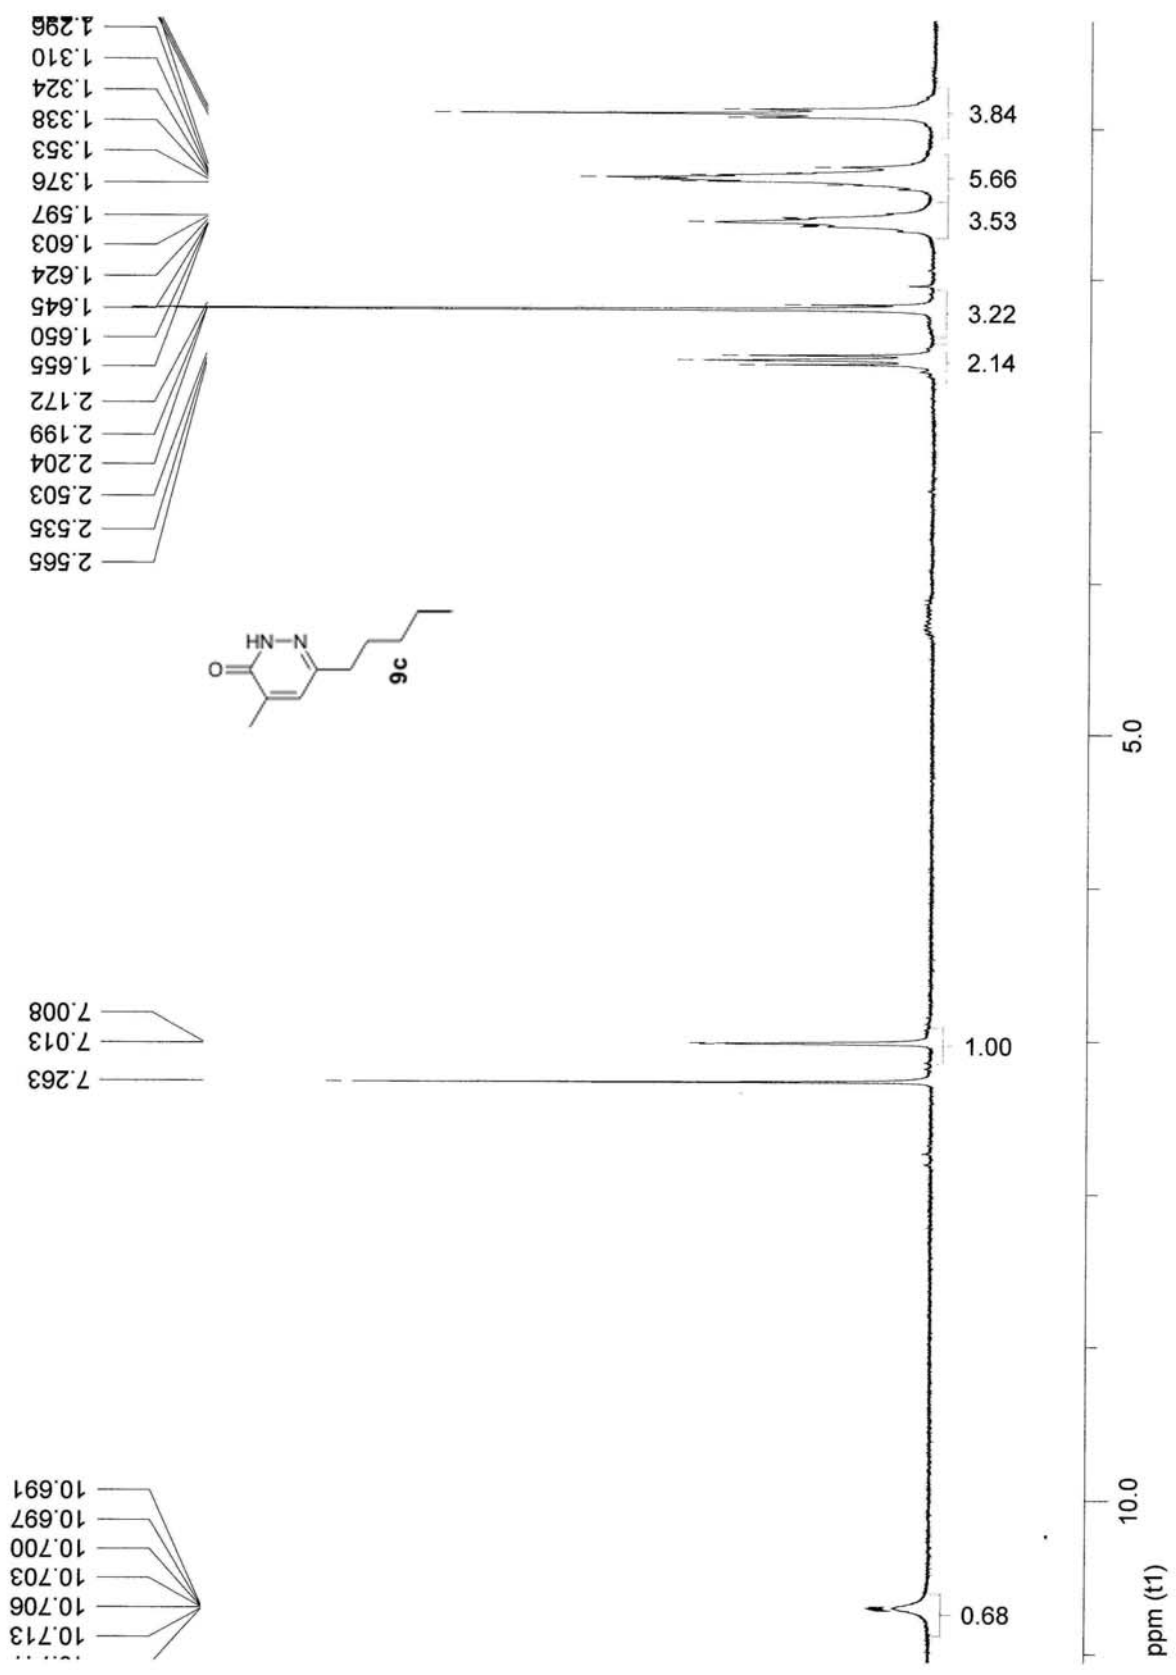

A. ALBRECHT

```

Current Data Parameters
NAME      AA-38-A
EXPNO    1
PROCNO   1

F2 - Acquisition Parameters
Date_    20041227
Time     15.14
INSTRUM spect
PROBHD   5 mm Multinoel
PULPROG zgpg30
TD        32768
SOLVENT  CDCl3
NS        800
DS        4
SWH      19860.080 Hz
FIDRES   0.609133 Hz
AQ        0.8208884 sec
RG        11595.2
DM        25.050 usec
DE        30.00 usec
TE        298.2 K
D1        2.0000000 sec
d11       0.0300000 sec
DELTA    1.8999998 sec
NCREST   0.0000000 sec
NMRK     0.0150000 sec

***** CHANNEL f1 *****
NUC1      13C
P1        15.60 usec
PL1       -6.00 dB
SFO1     62.9025058 MHz

***** CHANNEL f2 *****
CPDPRG2  waltz16
NUC2      1H
PCPD2    100.00 usec
PL2       -4.00 dB
PL12     16.09 dB
PL13     18.00 dB
SFO2     250.1310005 MHz

F2 - Processing parameters
SI        65536
SF        62.8952423 MHz
EN
MDM       0
SSB       0
-B        2.00 Hz
-SB       0
-GC       1.40

1D NMR F1/F2 Parameters
CX        21.50 cm
CY        16.50 cm
FIP       170.000 ppm
F1        10952.19 Hz
F2        -0.000 ppm
PPNCH     7.90698 ppm/cm
HZCN     487.31119 Hz/cm
    
```

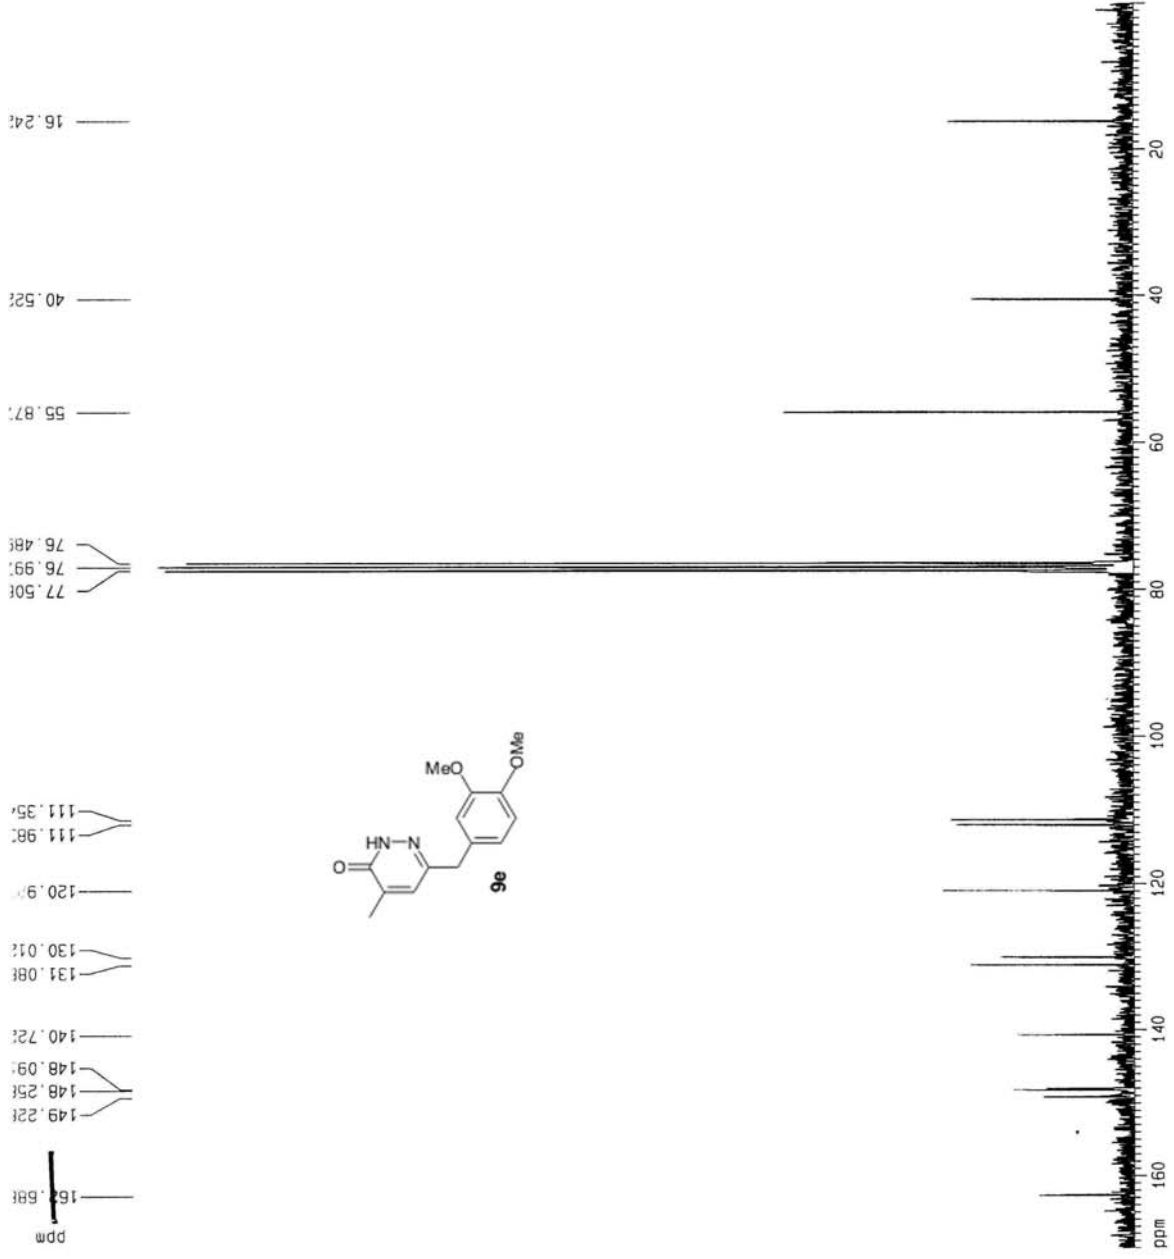

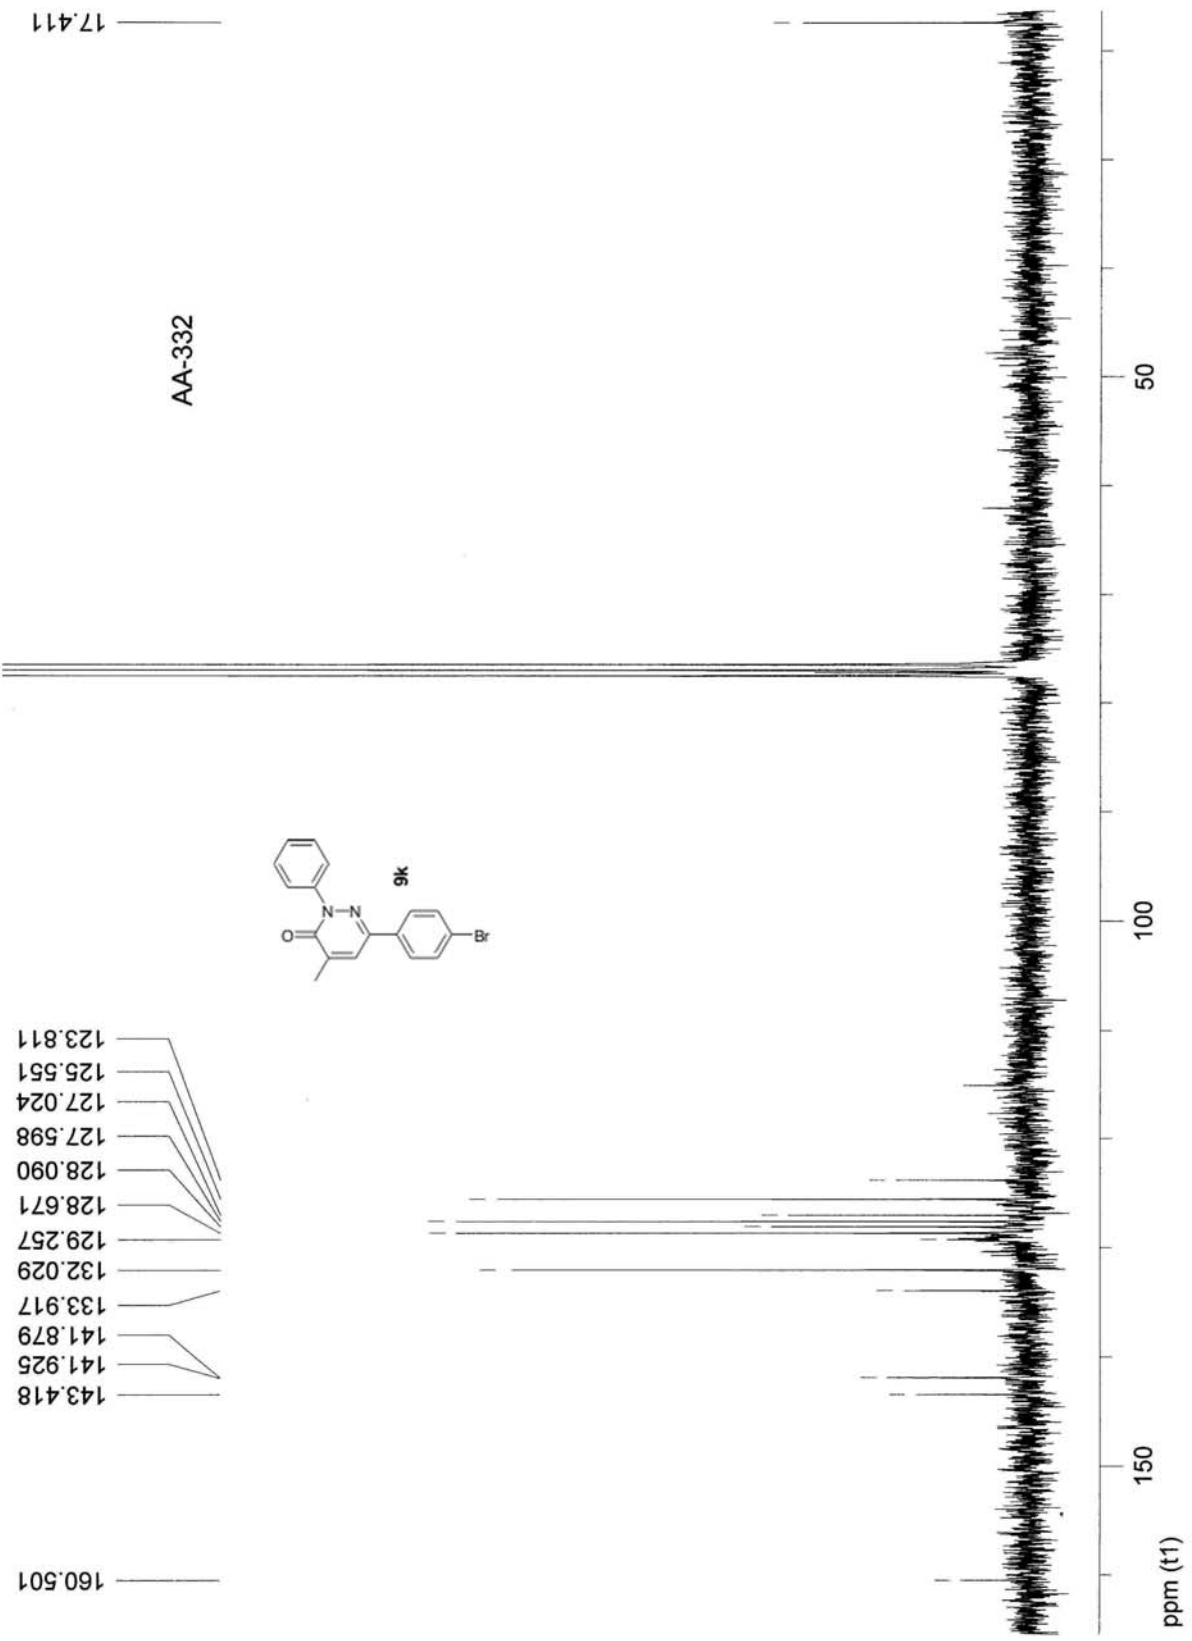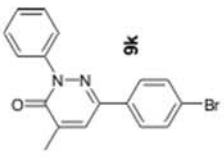

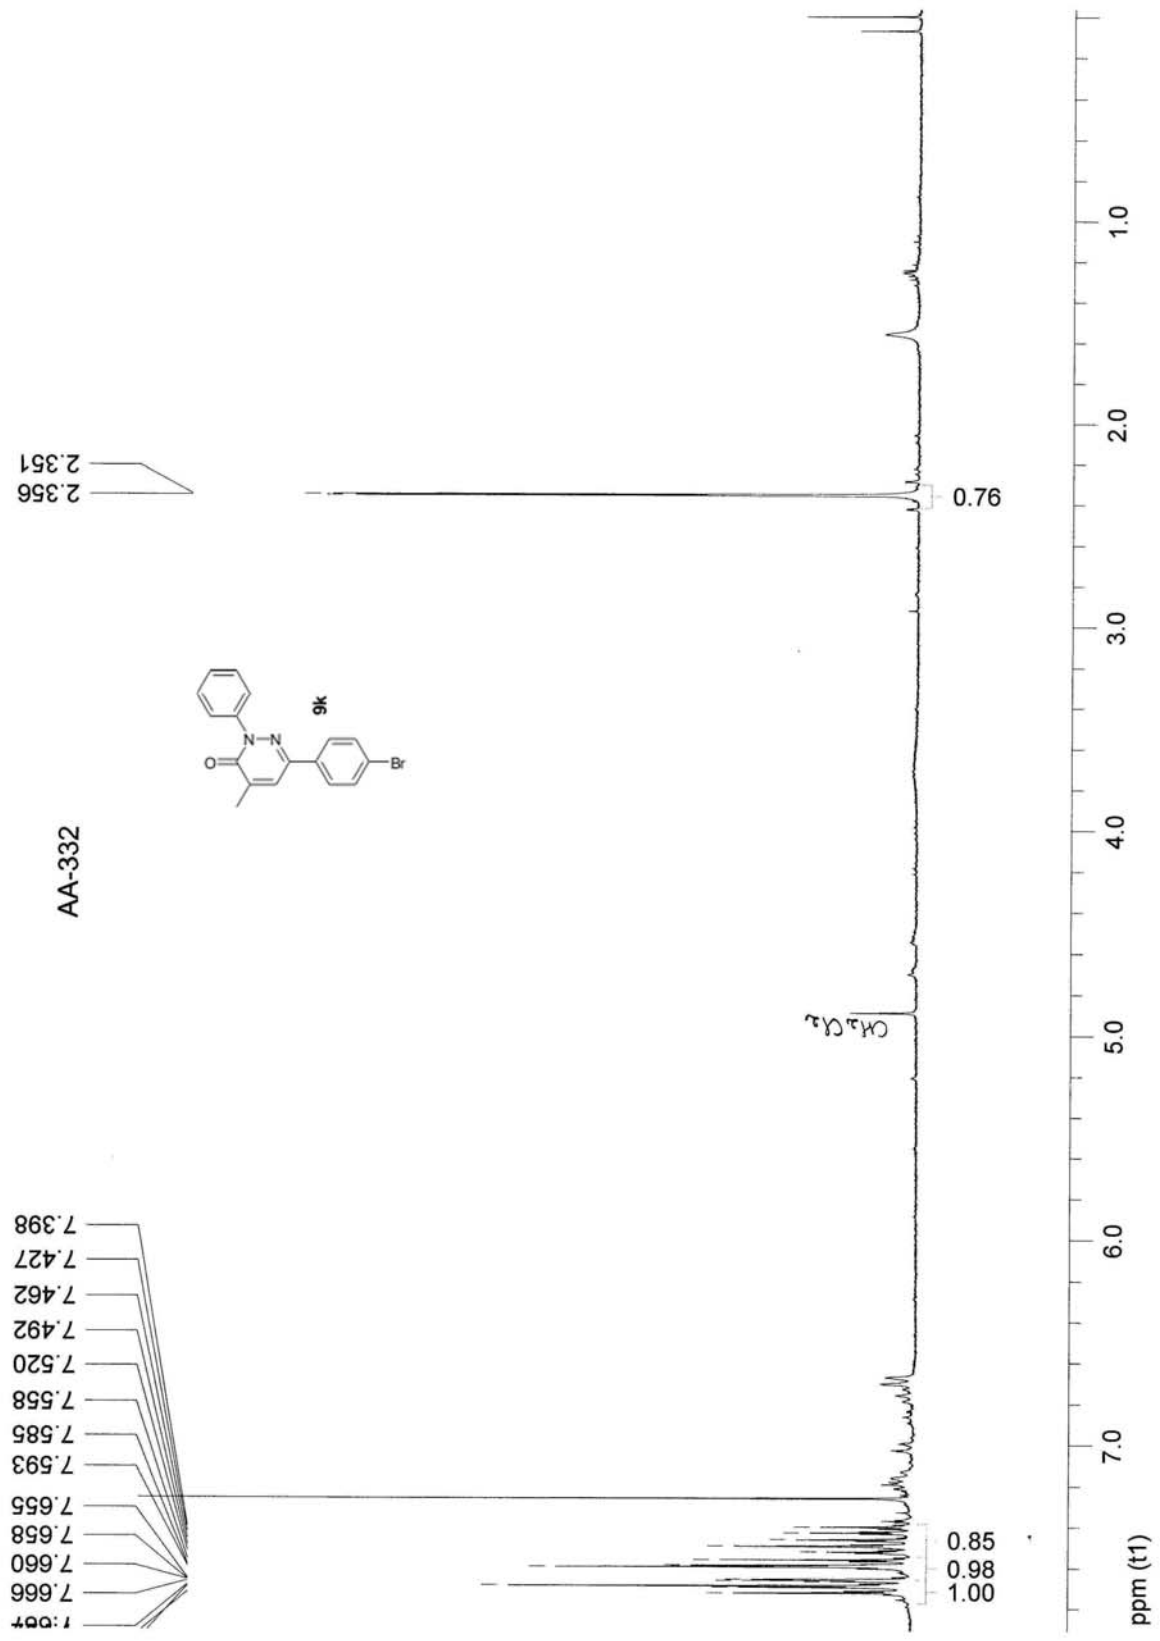

AA-332

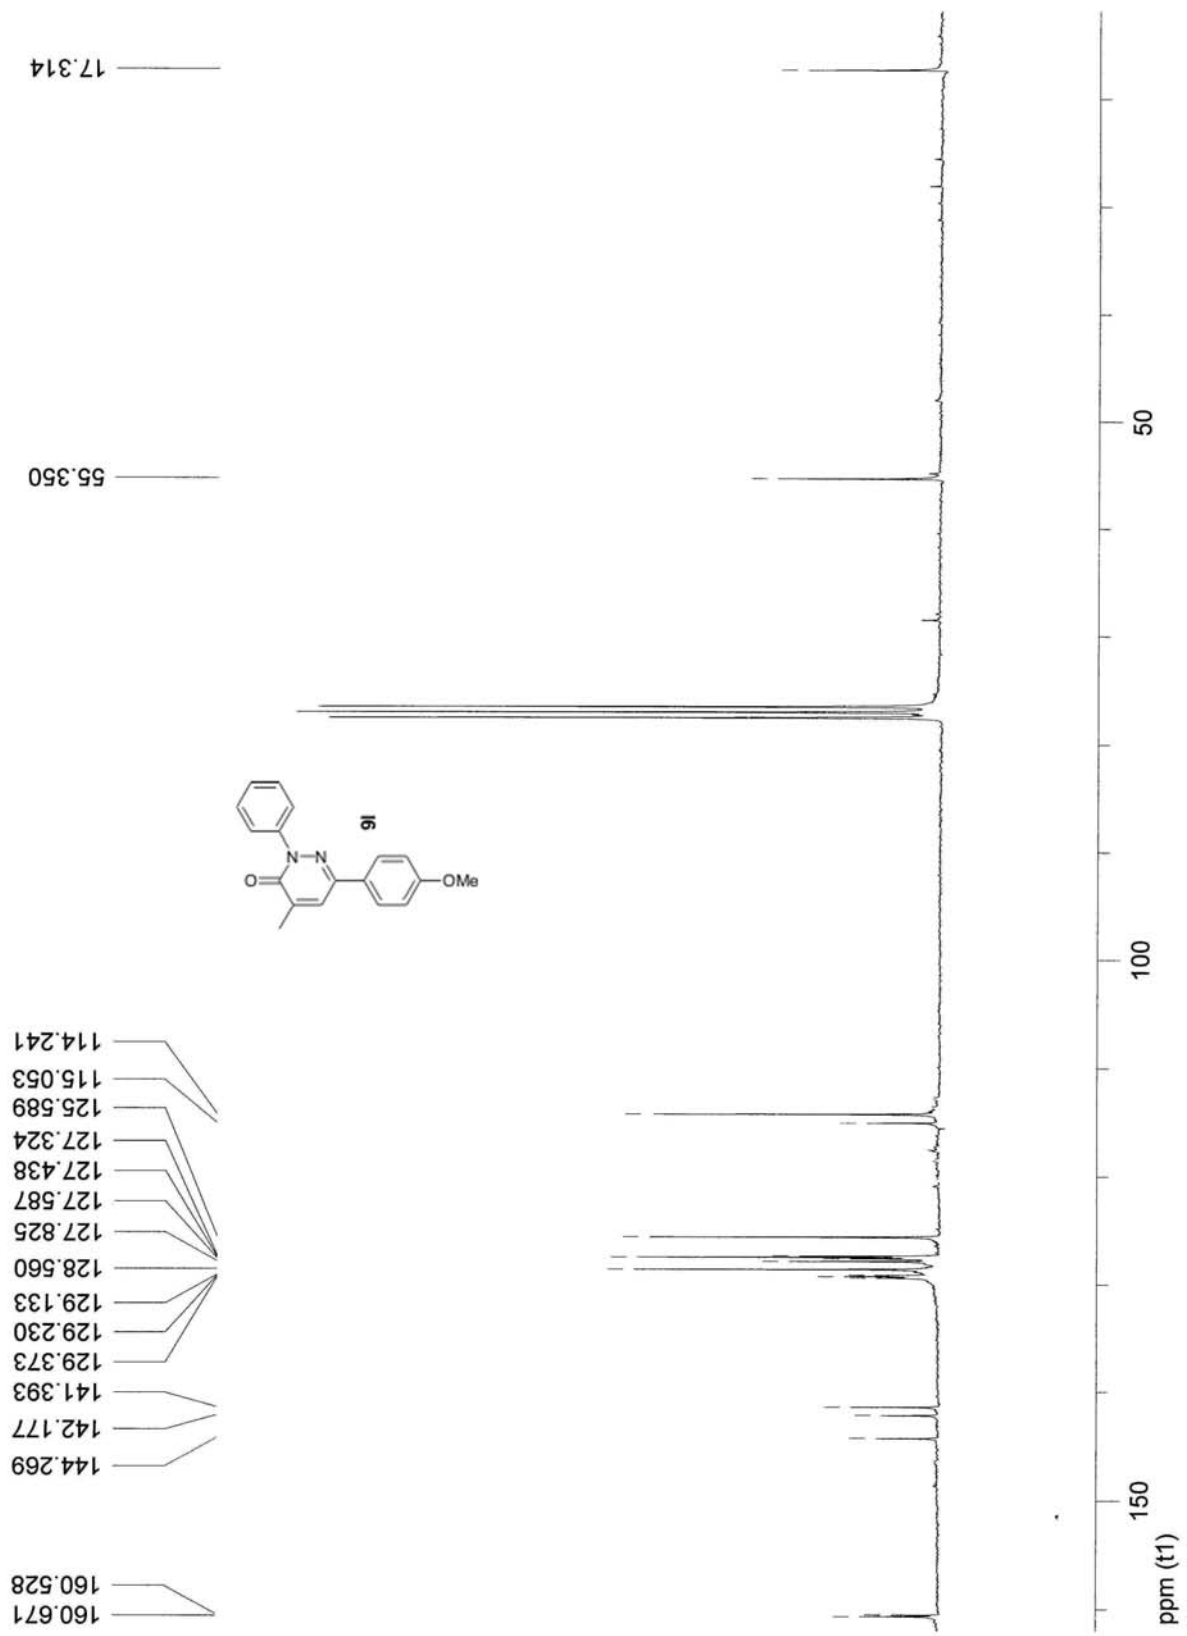

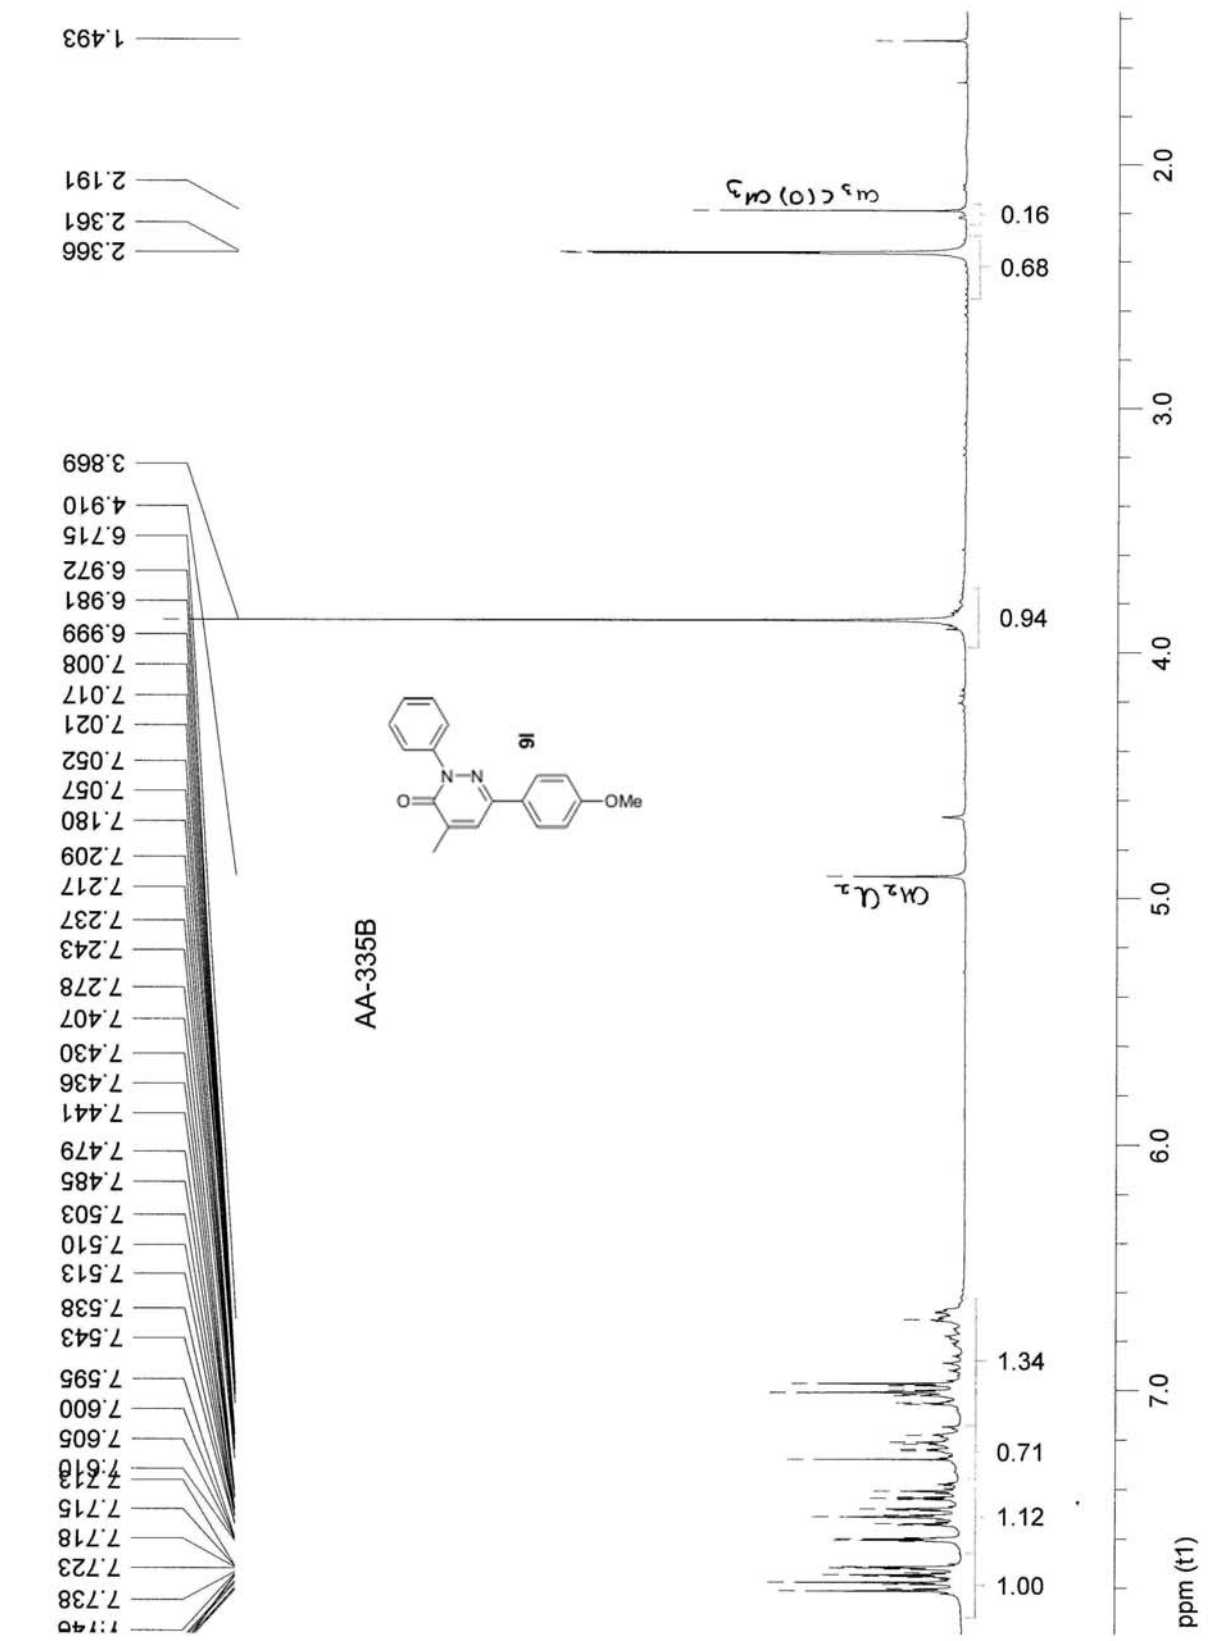

AA-335B

CH<sub>3</sub>C(O)CH<sub>3</sub>

CH<sub>2</sub>CH<sub>2</sub>

9i

A. Albrecht

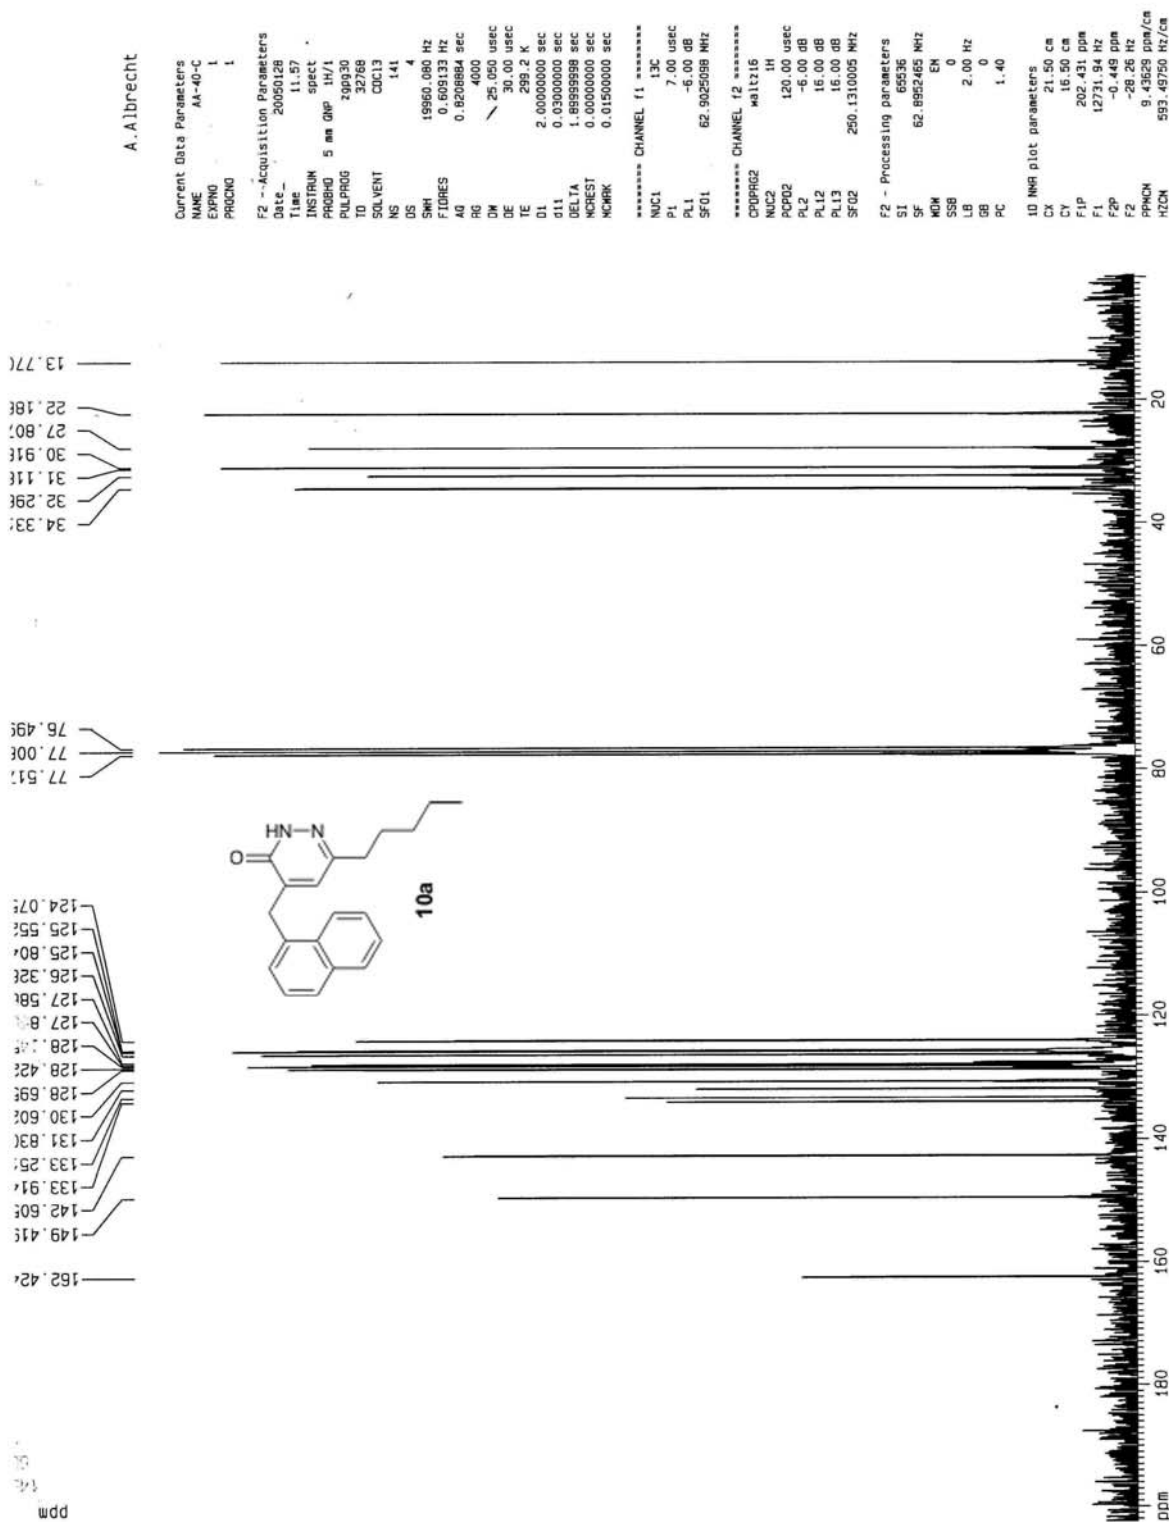

A. ALBRECHT

Current Data Parameters  
NAME AA-40C  
EXPNO 1  
PROCNO 1

F2 - Acquisition Parameters  
Date\_ 20050125  
Time 16.38  
INSTRUM spect  
PROBHD 5 mm QNP 1H/1  
PULPROG zg30  
TD 32768  
SOLVENT CDCl3  
NS 32  
DS 4  
SWH 3742.515 Hz  
FIDRES 0.114212 Hz  
AQ 4.3778548 sec  
RG 2048  
DM 133.600 usec  
DE 15.00 usec  
TE 297.2 K  
D1 1.0000000 sec  
ICREST 0.0000000 sec  
MCWRK 0.01500000 sec

\*\*\*\*\* CHANNEL f1 \*\*\*\*\*  
NUC1 1H  
P1 9.50 usec  
PL1 -6.00 dB  
SFO1 250.1316258 MHz

F2 - Processing parameters  
SI 32768  
SF 250.1300083 MHz  
WDW EM  
SSB 0  
LB 0.05 Hz  
GB 0  
PC 1.00

ID NMR plot parameters  
CX 21.50 cm  
CY 12.50 cm  
FIP 11.000 ppm  
F1 2751.43 Hz  
F2P -0.500 ppm  
F2 -125.06 Hz  
PPMCM 0.53488 ppm/cm  
HZCM 133.79047 Hz/cm

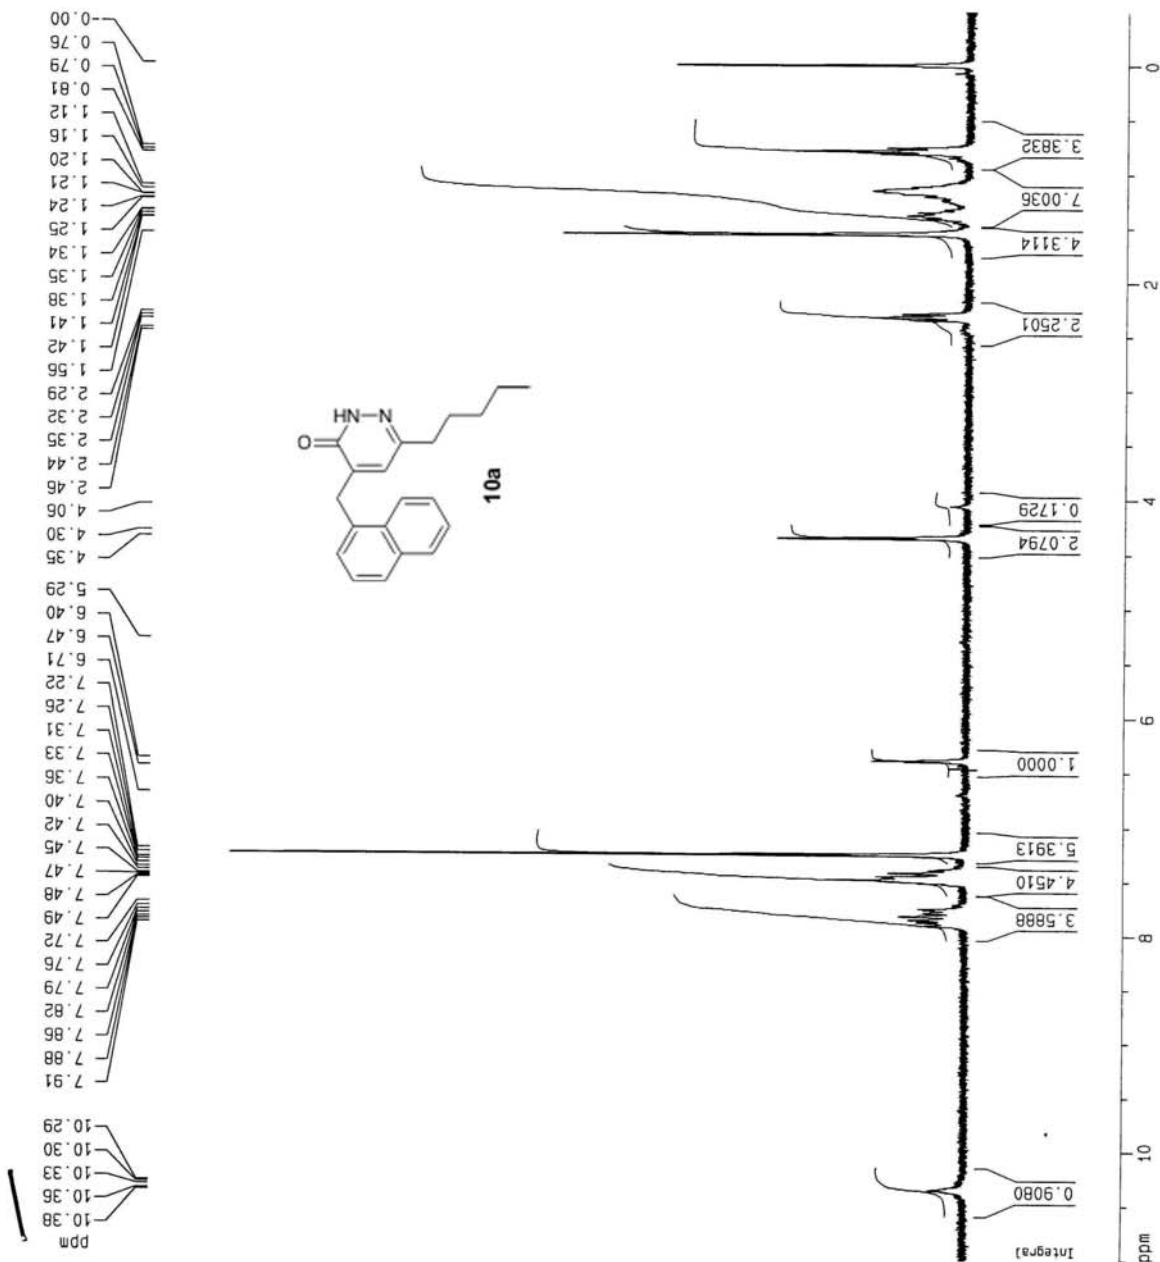



A. ALBRECHT

Current Data Parameters  
 NAME AA-47-A1  
 EXPNO 1  
 PROCNO 1

F2 - Acquisition Parameters  
 Date\_ 20050126  
 Time 11.48  
 INSTRUM spect  
 PROBHD 5 mm QNP 1H/1  
 PULPROG zgpg30  
 TO 32768  
 SOLVENT CCL3  
 NS 165  
 DS 4  
 SWH 15960.080 Hz  
 FIDRES 0.609133 Hz  
 AQ 0.620884 sec  
 RG 7296.2  
 DM 25.050 usec  
 DE 30.00 usec  
 TE 299.2 K

01 2.0000000 sec  
 011 0.0300000 sec  
 DELTA 1.8959998 sec  
 NCREST 0.0000000 sec  
 NCHRX 0.0150000 sec

\*\*\*\*\* CHANNEL f1 \*\*\*\*\*  
 NUC1 13C  
 P1 7.00 usec  
 PL1 -6.00 dB  
 SF01 62.9025698 MHz

\*\*\*\*\* CHANNEL f2 \*\*\*\*\*  
 CPDPRG2 waltz16  
 NUC2 1H  
 PCPD2 120.00 usec  
 PL2 -6.00 dB  
 PL12 16.00 dB  
 PL13 16.00 dB  
 SF02 250.1310005 MHz

F2 - Processing parameters  
 SI 65536  
 SF 62.852432 MHz  
 HZM EN  
 SSB 0  
 LB 4.00 Hz  
 GB 0  
 PC 1.40

10 NMR plot parameters  
 CX 21.50 cm  
 CY 16.50 cm  
 FIP 202.431 ppm  
 F1 12731.94 Hz  
 F2 -28.26 Hz  
 PPRCN 9.43629 ppm/cm  
 HZCN 593.48744 Hz/cm

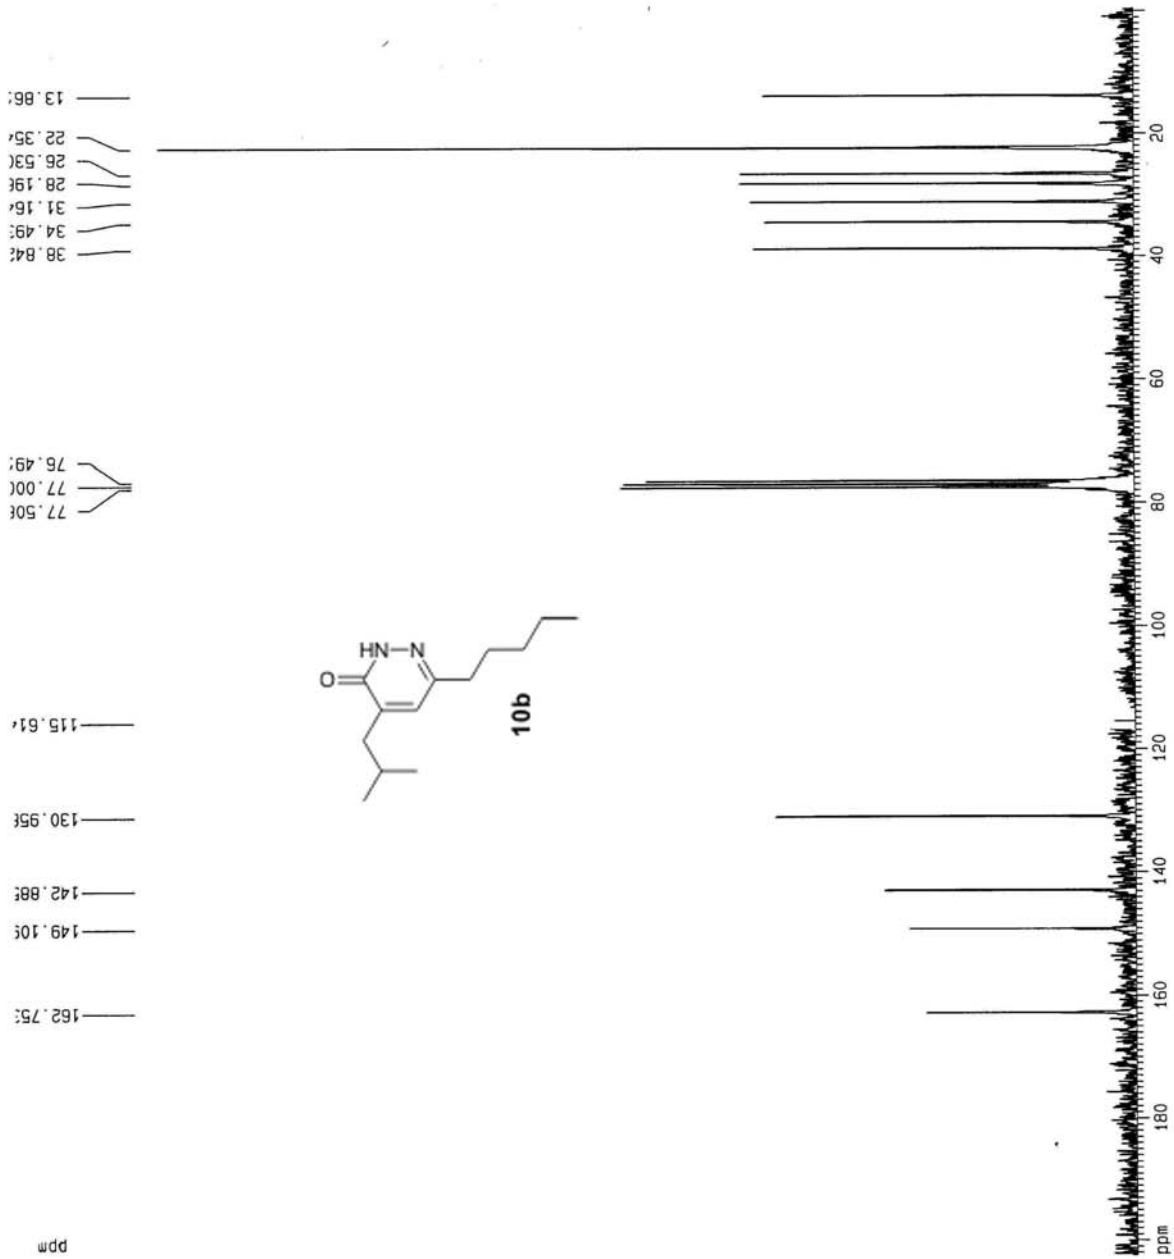

A. ALBRECHT

Current Data Parameters  
NAME AA-47-A1  
EXPNO 1  
PROCNO 1

F2 - Acquisition Parameters

Date\_ 20050124  
Time\_ 14.47  
INSTRUM spect  
PROBHD 5 mm QNP 1H/1  
PULPROG zg30  
TD 32768  
SOLVENT CDCl3  
NS 32  
DS 4  
SWH 3742.515 Hz  
FIDRES 0.114212 Hz  
AQ 4.3778548 sec  
RG 2896.3  
OW 133.600 usec  
DE 15.00 usec  
TE 298.2 K  
D1 1.0000000 sec  
MCREST 0.0000000 sec  
MCPRK 0.01500000 sec

\*\*\*\*\* CHANNEL f1 \*\*\*\*\*  
NUC1 1H  
P1 9.50 usec  
PL1 -6.00 dB  
SF01 250.1316258 MHz

F2 - Processing parameters  
SI 32768  
SF 250.1300084 MHz  
WDW EM  
SSB 0  
LB 0.05 Hz  
GB 0  
PC 1.00

ID NMR plot parameters  
CX 21.50 cm  
CY 12.50 cm  
FIP 7.500 ppm  
F1 1675.98 Hz  
F2 -0.500 ppm  
F2 -125.07 Hz  
PPHM 0.37209 ppm/cm  
HZCM 93.07163 Hz/cm

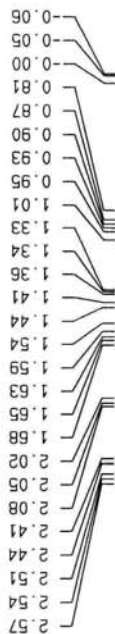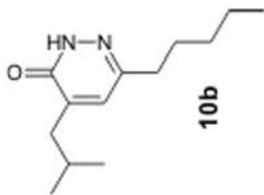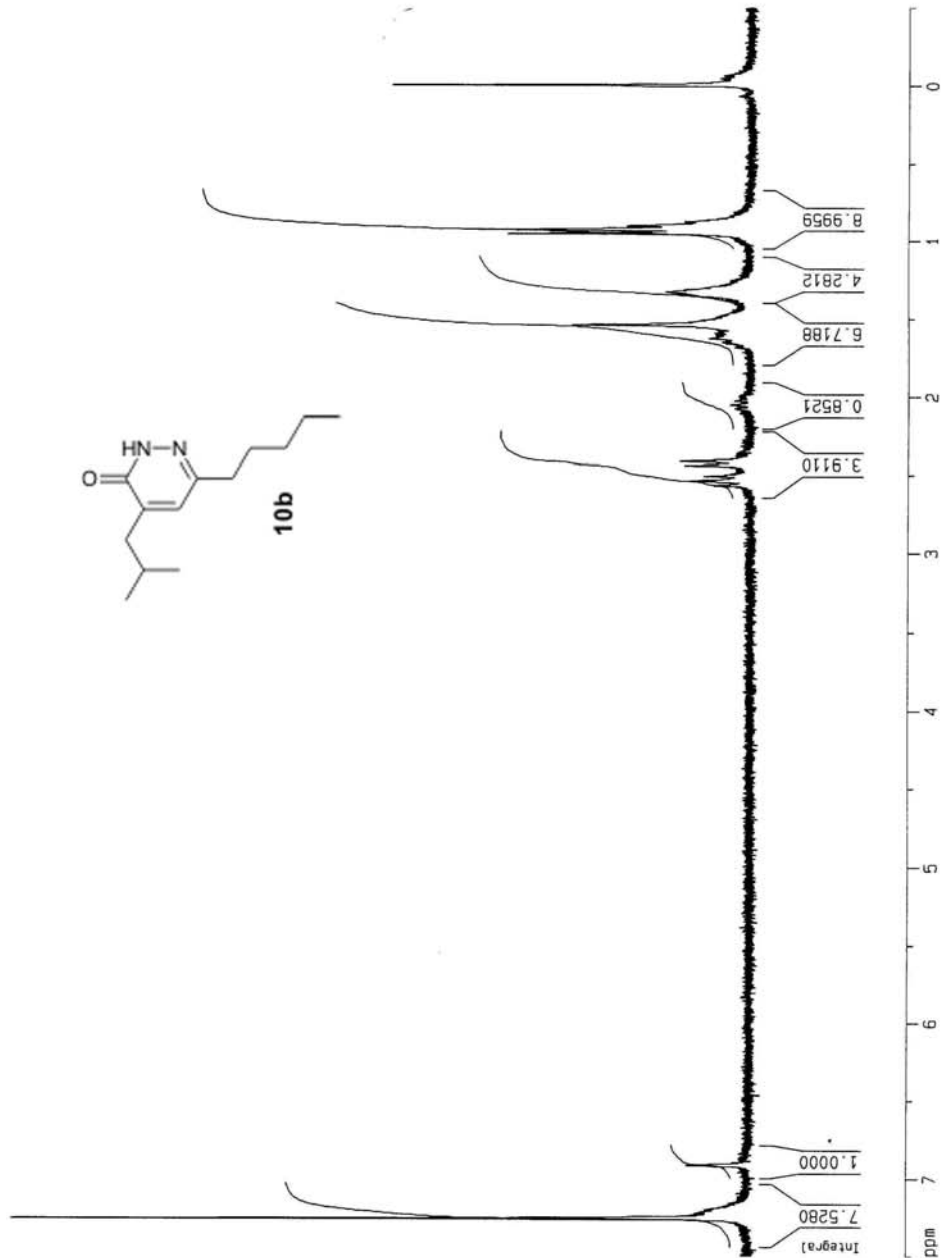

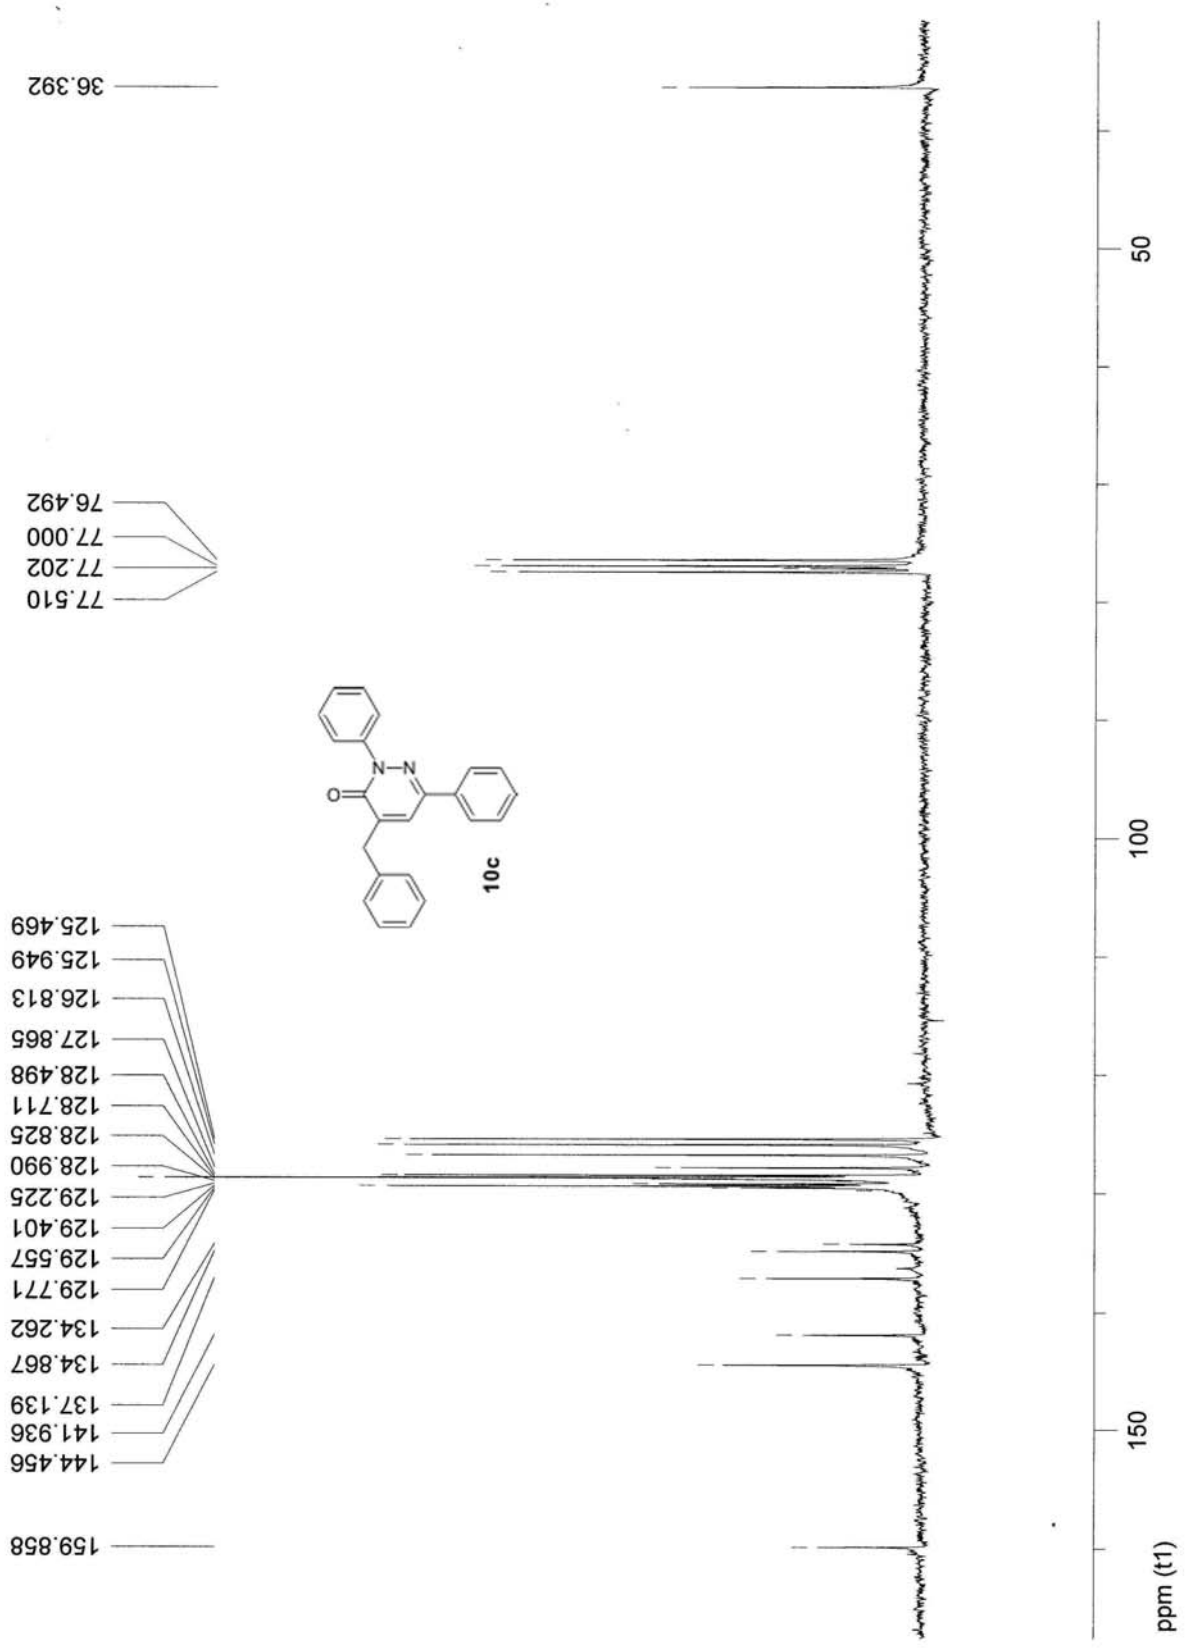

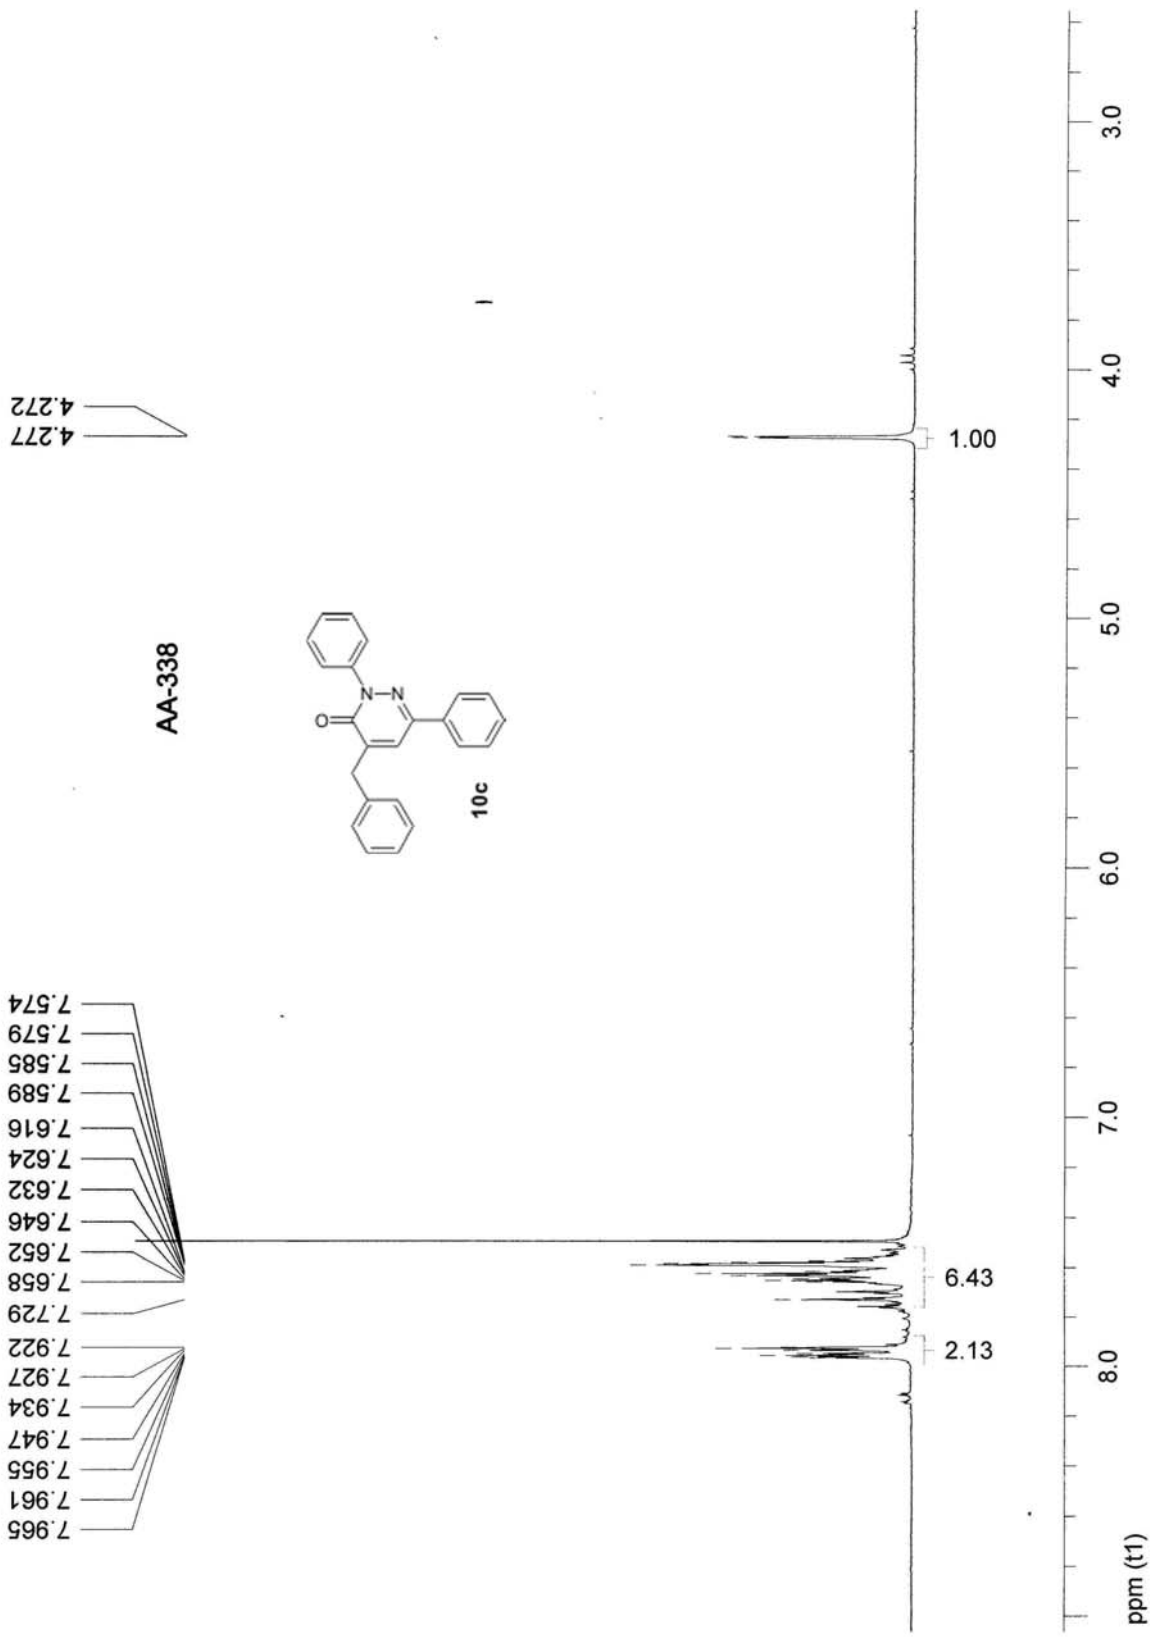

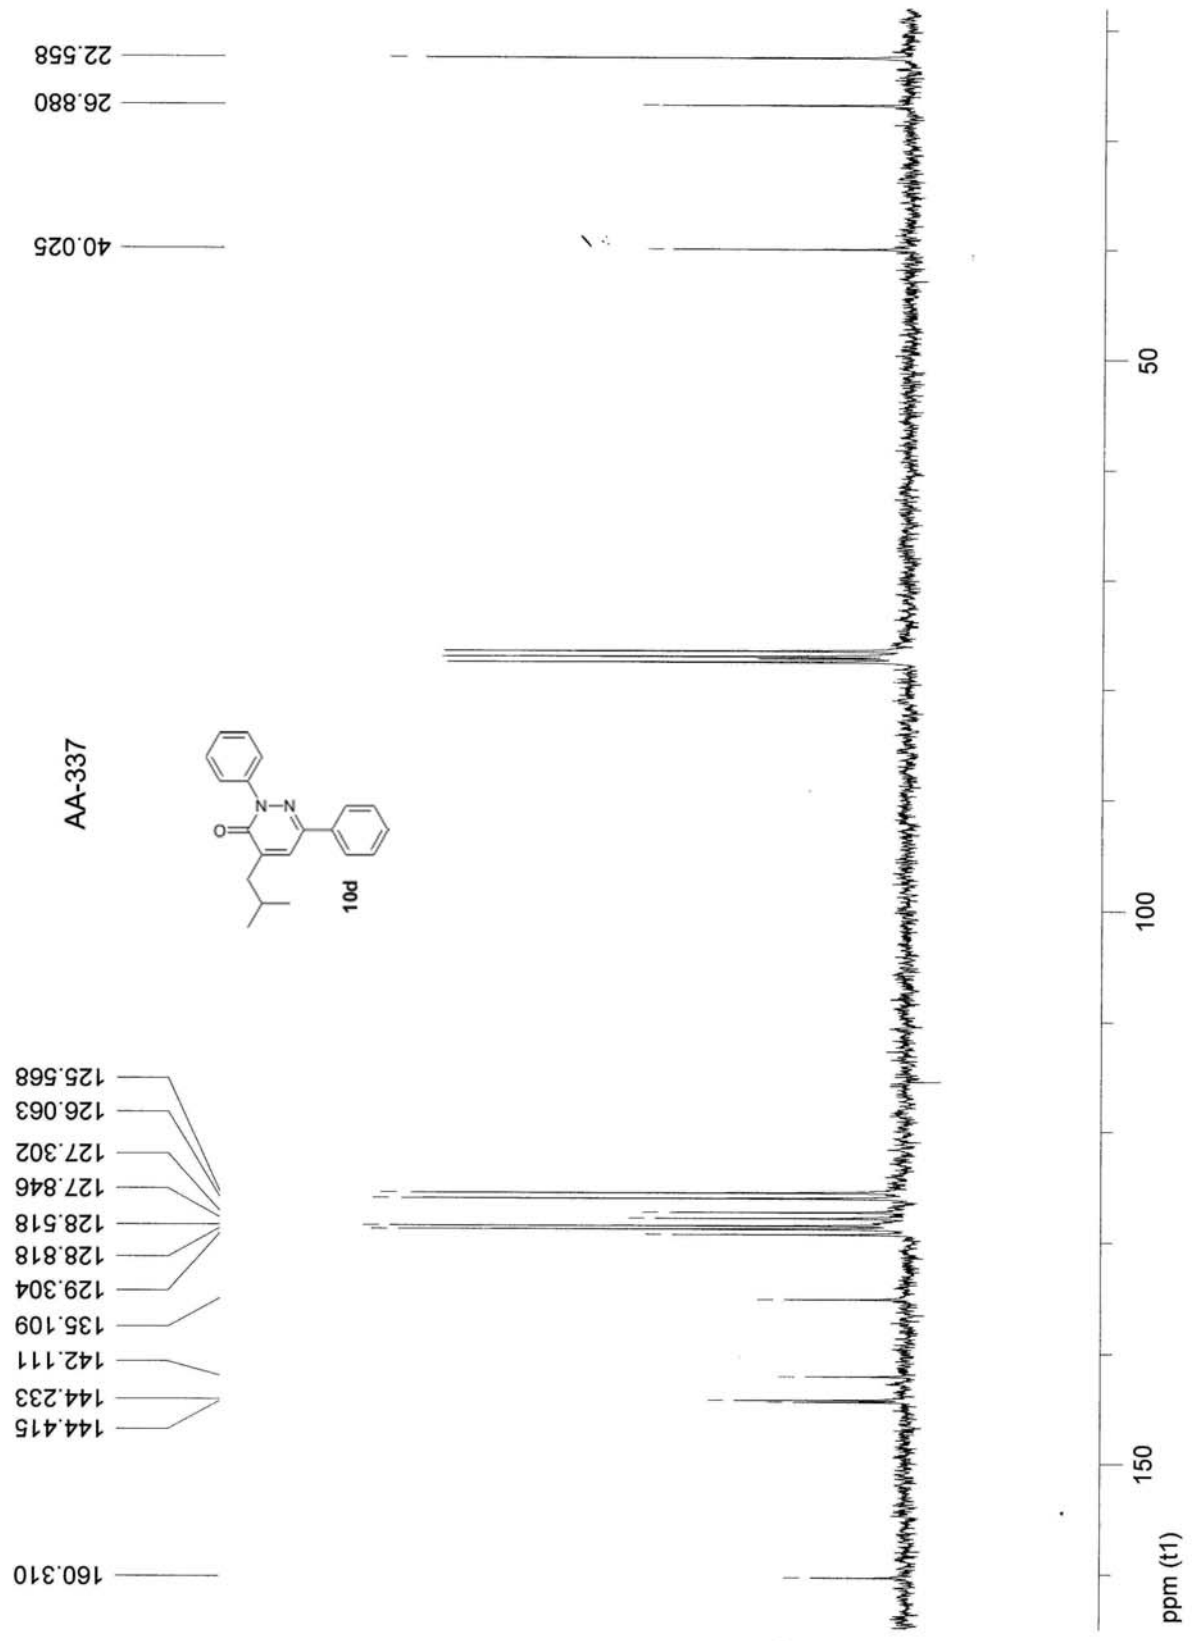

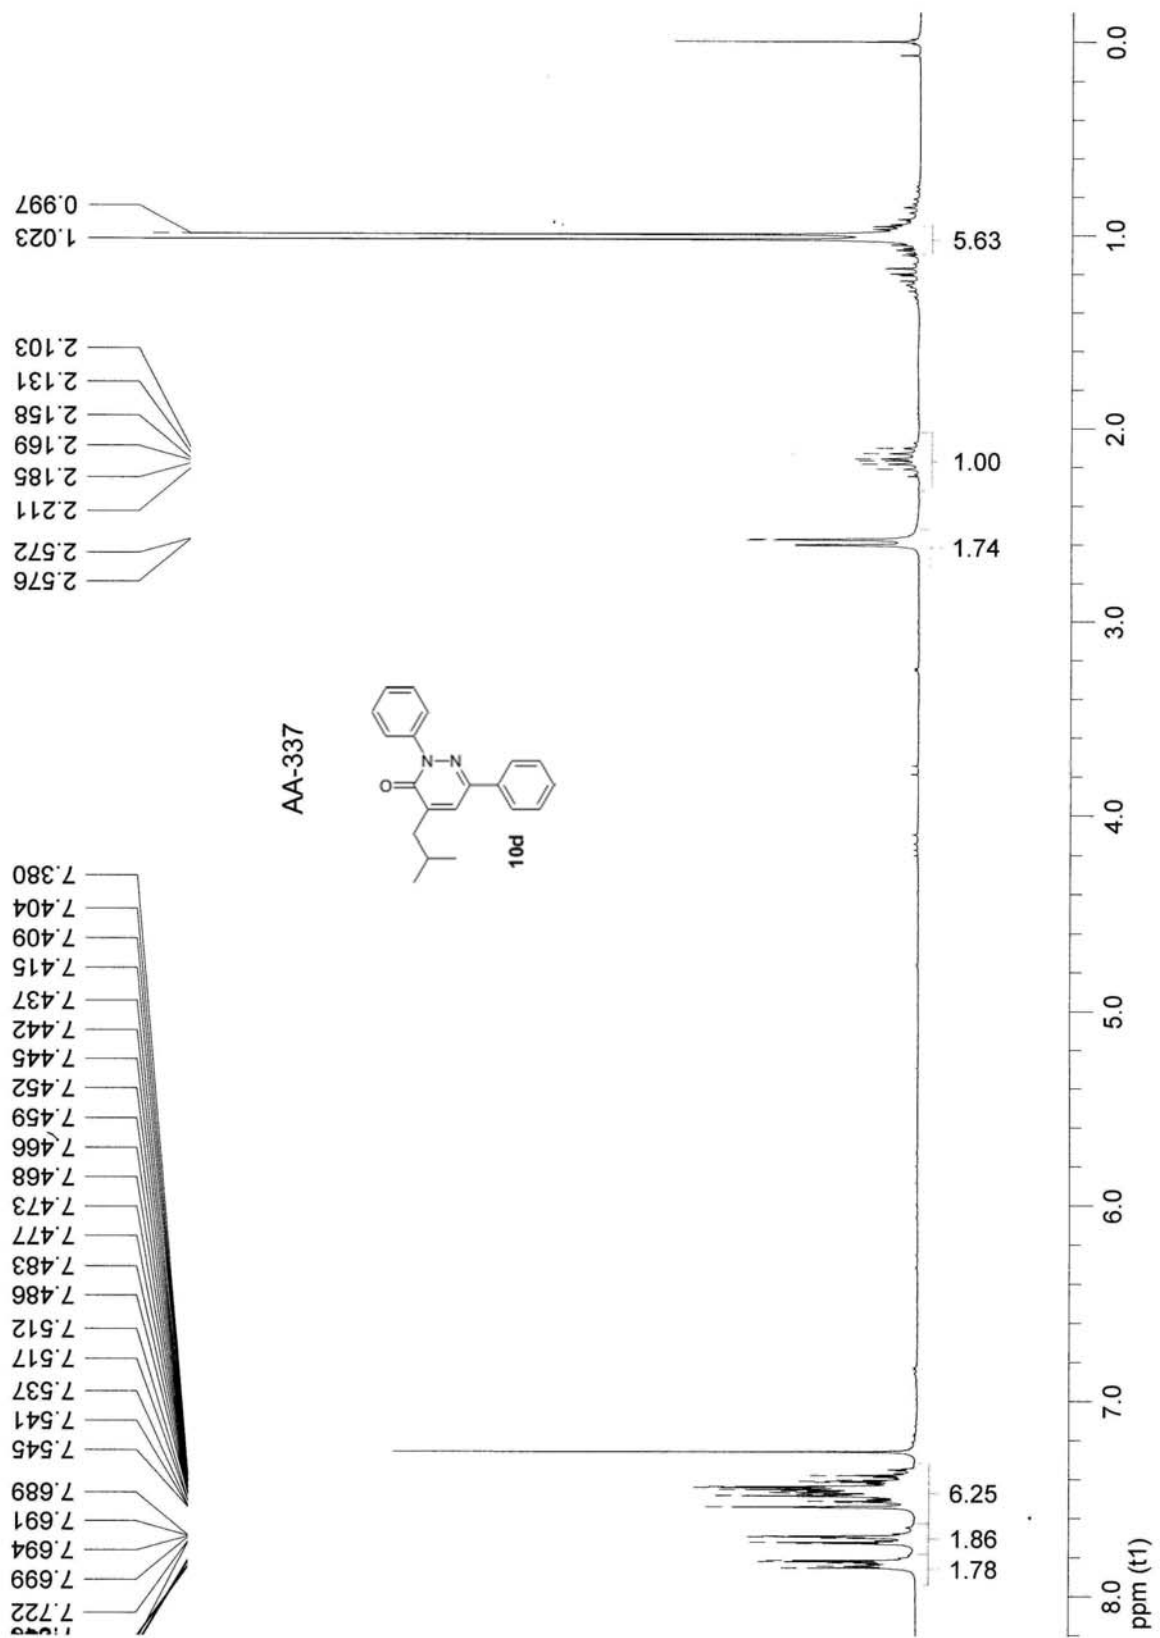

AA-337

10d
